# Supplementary material for: Effects of Spent Mushroom Compost on Physicochemical Properties of Degraded Soil
Source: Copernicus journal article supplement (doi:10.5194/se-2016-122), 2016-09-30
Supplement: Supplementary file [file se-2016-122-AC1-supplement.pdf]

1 **Effects of Spent Mushroom Compost Application Physicochemical Properties of**  
2 **Degraded Soil**

3 İlknur Gümüş

4 Department of Soil Science and Plant Nutrition, Faculty of Agriculture, University of Selçuk,  
5 42031 Konya, Turkey

6 Tel: +903322232932 Fax: +903322410108

7 Correspondence to: İlknur Gümüş,\*ersoy@selcuk.edu.tr

8 Cevdet ŞEKER

9 Department of Soil Science and Plant Nutrition, Faculty of Agriculture, University of Selçuk,  
10 42031 Konya, Turkey

11 Tel: +903322232928 Fax: +903322410108

12 **Abstract**

13 Land and laboratory studies show that the application of organic amendments into the soil  
14 improves the physicochemical properties of it. The study aims to study explore spent  
15 mushroom compost (SMC) application on the physicochemical properties of a weak-  
16 structured and degraded soil. The approach involved establish a pot experiment with spent  
17 mushroom compost applications (control, 0.5%, 1%, 2%, 4% and 8%), soil samples were  
18 incubated at field capacity for 21, 42, and 62 days. Spent mushroom compost applications into  
19 the soil significantly increased the aggregate stability (AS) and decreased the modulus of  
20 rupture. Application of SMC at the rate of 1%, 2%, 4%, and 8% were significantly increased  
21 the total nitrogen (N) and soil organic carbon (SOC) contents of the degraded soil at all  
22 incubation periods ( $p < 0.05$ ). The results obtained from this study clearly indicated that the  
23 application of spent mushroom compost reduces the modulus of rupture and ameliorates the  
24 increase of total nitrogen and soil organic carbon content.

25 Keywords: Aggregate stability, modulus of rupture, soil aggregation, soil structure, spent mushroom compost

26 **1 Introduction**

27 Soil quality is defined as the capacity of the soil to function within natural or managed  
28 ecosystem and land use boundaries, sustain biological productivity, to promote the quality of  
29 air and water environments, and to maintain plant, animal and human health (Doran et al.,  
30 1997; Karlen et al., 1997). Physical and chemical attributes are the main indicators used to  
31 assess soil quality (Bone et al., 2014; Paz-Ferreiro and Fu, 2013; Pulido Moncada et al.,  
32 2015). Soil quality is threatened by intensive management of the available urbanization and  
33 agricultural land, and by the increase in human activities (Paz-Ferreiro and Fu, 2013). Soil  
34 quality is another important aspect closely related to soil degradation. Soil degradation  
35 decreases land productivity (Yu and Jia, 2014). Degradation of land can be divided into three  
36 types: arid, semi-arid, and sub-humid dry areas from various factors, including climatic

37 variations and human activities (Yu and Jia, 2014). Soil degradation problem is particularly  
38 serious in the Mediterranean areas, where the effects of anthropogenic activities add to the  
39 problems caused by prolonged periods of drought and intense and irregular rainfall (Hueso-  
40 González et al., 2014). Vegetation degradation, land use change, and soil are among the  
41 degradation factors that causes soil carbon and nitrogen losses (Moreno et al., 2016; Peng et  
42 al., 2015). The reduction in soil structure is considered as a form of soil degradation (Chan et  
43 al., 2003), and is always with regards to land use and soil crop management practices.

44 Physical and structural soil degradation occurs mostly due to the decrease in soil organic  
45 matter caused by excessive soil cultivation (Grandy et al., 2002). Şeker and Karakaplan  
46 (1999) reported that the loss of organic matter is generally associated with a decrease in soil  
47 porosity and wet aggregate stability, as well as the increase in soil strength indices. Soil water  
48 movement and retention, crusting, root penetration, crop yield, erosion, and nutrient recycling  
49 are influenced by soil structure (Bal et al., 2012; Bronick and Lal, 2005; Seker, 2003).  
50 Organic materials are important soil additives that help to improve soil physical, chemical,  
51 and biological properties. Organic materials can improve the fertility of soil and soil  
52 amelioration (Wu et al., 2014). Besides good yield, these organic materials have been  
53 beneficial for soil chemical and physical fertility and stability that are possible due to organic  
54 matter (Mukherjee et al., 2014). Sustaining the productivity of soils is important, particularly  
55 in semi-arid regions (such as Turkey) where there is low input of organic materials (Gümüş  
56 and Şeker, 2015).

57 Mushroom cultivation has recently become very popular in Turkey, and is a promising new  
58 industry, with many new businesses developing every year. Mushroom production in Turkey  
59 is separated into two components: compost production and mushroom cultivation. Compost  
60 application to agricultural soil has been widely practiced as one of the approaches to improve  
61 crop productivity and soil fertility (Jaiarree et al., 2014). Spent mushroom compost can be  
62 used in organic farming to improve soil water infiltration, water holding capacity,  
63 permeability, and aeration. Composts provide a stabilized form of organic matter that  
64 improves the physical properties of soils by increasing both nutrient and water holding  
65 capacity, total pore space, aggregate stability, erosion resistance, temperature insulation, and  
66 the decreasing apparent soil density (Shiralipour et al., 1992).

67 The objective of this study is to indicate the effects of SPM application to degraded soil with  
68 specific emphasis on aggregate stability, the modulus of rupture, electrical conductivity (EC),  
69 nitrogen, and organic carbon.

## 70 **2 Materials and Methods**

71 Soil was collected from a problematic plot in the Agricultural Faculty of Selçuk University  
72 experiment station (0-20 cm soil depth) near the Konya Sarıcalar-Village located in central  
73 Anatolia, Turkey ( latitude of 38° 05' 56" N, longitude of 32° 36' 29" E, 1009 m above mean  
74 sea level). The climate is semi-arid, with an annual precipitation of 379.38 mm, an annual  
75 mean temperature of 11.5 °C, and an annual mean evaporation of 1226.4 mm (MGM, 2015).  
76 Soil moisture and temperature regimes are xeric and mesic, respectively, according to the  
77 climate data (Staff, 2006). Soil was classified as Fulivent (Staff, 2006). The soil sample used

78 in this study has certain problems, such as insufficient seedling emergency, low aggregate  
 79 stability, crusting problem, and low organic matter content (Bal et al., 2012). The area has a  
 80 typically rain-fed attribute with cultivation practices and various crops such as grains, sugar  
 81 beet, and corn with fruit trees of various ages. A portion of the land is located in the fruits  
 82 trees of different ages and types. The spent mushroom compost (SMC) used in the present  
 83 study were obtained from private companies dealing with mass mushroom production located  
 84 in Konya, Turkey.

85 **Table 1.** Some properties of the soil

| <b>Soil properties</b>                           | <b>Values</b> | <b>Soil properties</b>             | <b>Values</b> |
|--------------------------------------------------|---------------|------------------------------------|---------------|
| Sand (2-0.05 mm) (%)                             | 6.65          | Field capacity (%)                 | 35.6          |
| Silt (0.05-0.002 mm) (%)                         | 34.17         | Wilting point (%)                  | 16.19         |
| Clay (<0.002 mm) (%)                             | 59.18         | Aggregate stability (%)            | 10.83         |
| Textural class                                   | C             | Bulk density (g cm <sup>-3</sup> ) | 1.09          |
| pH (H <sub>2</sub> O, 1:2.5)                     | 7.96          |                                    |               |
| EC (H <sub>2</sub> O, 1:2.5) μS cm <sup>-1</sup> | 479           |                                    |               |
| C (%)                                            | 1.35          |                                    |               |
| Carbonates (%)                                   | 11.58         |                                    |               |

86

87 **Table 2.** Properties of the Spent Mushroom Compost (SMC)

| <b>Properties</b>                                | <b>SMC</b> |
|--------------------------------------------------|------------|
| pH (H <sub>2</sub> O, 1:2.5)                     | 7.36       |
| EC (H <sub>2</sub> O, 1:2.5) μS cm <sup>-1</sup> | 5390       |
| C (%)                                            | 38.80      |
| N (%)                                            | 2.61       |
| C/N                                              | 14.88      |
| Organic matter (%)                               | 66.89      |

88

89 The experiment was carried out in a completely randomized plot design with three  
 90 replications and conducted under laboratory conditions as a pot experiment. Surface soil  
 91 samples (0-20 cm) were air-dried, ground, passed through a 2 mm sieve and mixed  
 92 homogeneously. Firstly, soil samples (2000 g) were placed in each pot (dimensions of pot;  
 93 13.5 cm x 17 cm). Six level of SMC, (0% (as control), 0.5%, 1%, 2%, 4%, and 8% by weight)  
 94 were incubated. During the incubation period, the soil moisture level in the pots was  
 95 maintained at 50-75% of field capacity. After various incubation periods (21, 42 and 62 days),  
 96 the soil samples in each pot were mixed to ensure homogeneity in soil sub-sample. The soils  
 97 were then sub-sampled (250 g) for analyses. Twenty first, 42<sup>nd</sup> and 62<sup>nd</sup> days of incubation  
 98 periods, the samples were analyzed with three replications.

99 Particle-size distribution was determined by the hydrometer method (Gee et al., 1986). The  
 100 moisture contents at field capacity and wilting point were determined with a pressure plate  
 101 apparatus (Cassel and Nielsen, 1986) at -33 and -1500 kPa, respectively. Soil pH and EC  
 102 values were determined by using a glass-calomel electrode in a 1:2.5 mixture (w/v) of soil and  
 103 water (Rhoades et al., 1996; Thomas, 1996). Soil organic carbon was determined on sample  
 104 ground to pass through a 0.5 mm sieve by the use of TruSpec CN Carbon/Nitrogen

105 Determinator (Cooperation, 2003). The modulus of rupture was determined at 0.5 kPa  
106 sensitivity by the procedure of Richards (1953) using briquettes prepared in moulds made  
107 from mild steel of rectangular cross-section, and with interior dimensions of  $7 \times 3.5 \times 1$  cm.  
108 The briquettes were prepared by using sieved subsoil samples ( $< 2$  mm), taken from each pot,  
109 which were then placed in a soaking tank of distilled water filled to the upper surface of the  
110 mould. They were allowed to stand for 1 h, and then dried at  $50^{\circ}\text{C}$ . The briquettes were  
111 broken by a downward motion of a bar of triangular cross section, the force being applied by  
112 water additions to a vessel. The modulus of rupture was calculated as follows:

113 Where MR is the modulus of rupture (kPa),  $f$  is the breaking force in grams of water  $\times 980$ ,  $L$   
114 is the distance between the lower supports in cm,  $b$  is the width of the briquette in cm, and  $d$  is  
115 the thickness of the briquette in cm (Reeve, 1965; Richards, 1953). Aggregate stability was  
116 determined by immersing the sieves containing the aggregate samples (between 1-2mm size)  
117 in distilled water at up and down oscillating on screens through 55 mm at 30 strokes  $\text{min}^{-1}$  for  
118 5 min (Kemper and Rosenau, 1986).

### 119 **3 Statistical analyses**

120 The data collected were subjected one-way analysis of variance (ANOVA) test and treatment  
121 means were compared at  $p < 0.05$  using the F-LSD significant difference test (Minitab, 1991).

## 122 **4 Results and Discussion**

### 123 **4.1 Aggregate stability (AS)**

124 Effects of SMC application on aggregate stability are given in Fig. 1. Aggregate stability  
125 values of the soil treated with different doses SMC application was measured after 21, 42, and  
126 62 days incubation periods, respectively. The effects of SMC application on soil aggregate  
127 stability values were significant. Generally, aggregate stability increased with SMC  
128 applications. These results may be explained by aggregate stability and soil organic matter  
129 that are two parameters and indicators for sustaining soil productivity. Aggregate stability is a  
130 key factor of soil fertility (Abiven et al., 2009). The recovery in aggregate stability of such  
131 physically degraded soils is important, as those studied was expected to follow the  
132 incorporation of any cementing agent, such as SMC (Curtin and Mullen, 2007). Aggregate  
133 stability decreased at 42 and 62 days of incubation periods in all SMC rates, when compared  
134 to a 21-day incubation period. Aggregate size distribution and stability can be used as an  
135 indicator of soil condition or degradation (Boix-Fayos et al., 2001). Soil organic matter seems  
136 to be the most important factor, in order to determine stabilizing soil aggregates (Aksakal et  
137 al., 2015; Candemir and Gülser, 2010; Cerdà, 1998). Organic matter shows a direct  
138 relationship with aggregate stability (Cerdà, 1998). In addition, after the incubation period, as  
139 a result of mechanical mixing practices, the aggregate stability of the soil samples decreased  
140 (Seker, 2003). Similarly, it is reported that there is an increase in the soils organic carbon  
141 concentration after organic matter application, and thus, a higher formation of stable  
142 aggregates (Arthur et al., 2011; Ferreras et al., 2006; Gümüs and Şeker, 2015; Murphy, 2001).

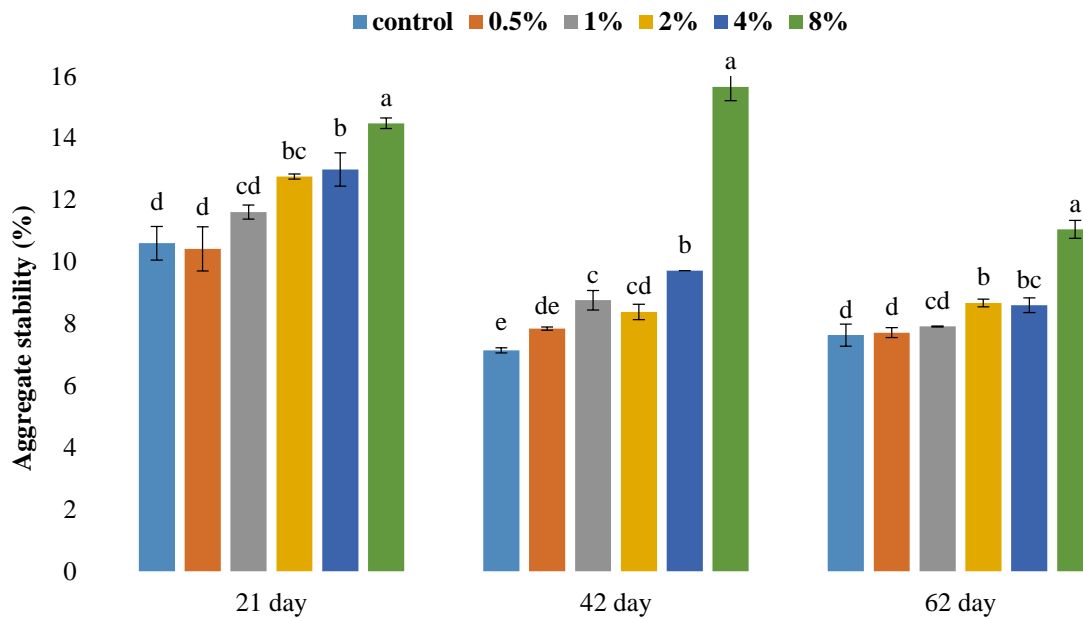

143  
 144 **Fig 1.** Effects of different rates of SMC applications on aggregate stability, Error bars indicate least significant  
 145 difference ( $P < 0.05$ ). For additional information regarding results of one way ANOVA LSD test. 0.5, 1, 2, 4 and  
 146 8% SMC

#### 147 **4.2 Soil modulus of rupture**

148 Effects of SMC application on soil modulus of rupture are shown in Fig. 2. All the SMC  
 149 applications resulted in significantly lower modulus of rupture at 21<sup>st</sup> and 42<sup>nd</sup> days, except  
 150 for the 62<sup>nd</sup> day incubation. In general, soil modulus of rupture decreased with the increasing  
 151 application rates of SMC. The effects were especially due to the high organic matter contents  
 152 of SPM that improved soil structure mechanically (Gümüs and Şeker, 2015; Seker, 2003).  
 153 The SMC used in the study contains significant amounts of organic substances. Reason for its  
 154 modulus of rupture can be related to the inhibitory effects of SPC on the tight unity formation  
 155 of soil particles. The structural stabilization is related to organic matter inputs (Caravaca et al.,  
 156 2002; Ferreras et al., 2006), and thus, a significant decrease in the modulus of rupture was  
 157 attained with the application rate of SMC. These results may be explained through the  
 158 formation of aggregates during the incubation periods. The modulus of rupture was reduced  
 159 because of the increase in organic amendments, which allowed less cohesion among the soil  
 160 particles (Seker, 2003). Organic amendments are known to decrease bulk density and particle  
 161 in soil (Moreno et al., 2016). The absence of such effects in 62 days can be related to the  
 162 decrease in aggregate stability and organic substances. This, most probably, resulted from the  
 163 breakdown of soil decomposition and the aggregates of soil organic matter by mixing pot  
 164 contents to simulate repeated cultivation (Carrizo et al., 2015; Seker, 2003).

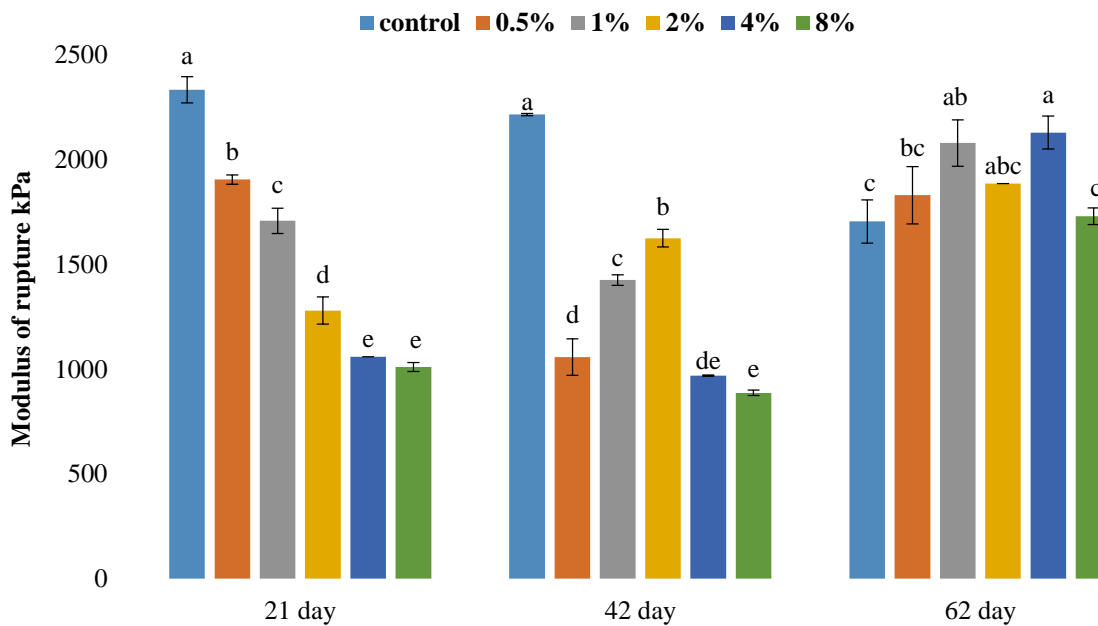

165

166 **Fig 2.** Effects of different rates of SMC applications on soil modulus of rupture, Error bars indicate least  
 167 significant difference ( $P<0.05$ ). For additional information regarding results of one way ANOVA LSD test. 0.5,  
 168 1, 2, 4 and 8% SMC

### 169 4.3 EC

170 The effects of SMC on EC values of the soil are given in Fig. 3. The EC values significantly  
 171 increased with respect to elevated SMC application. According to investigation soil, EC  
 172 gradually increased with incubation periods significantly, and the magnitude of such increase  
 173 was higher in the SMC-amended soil than the control soil. The increasing EC values in an  
 174 experiment for different doses of SMC application may be explained by the high content of  
 175 solutes nutrient composition of organic fragments, and the remains from the materials during  
 176 incubation periods (Yilmaz, 2010). EC can serve as a measure for the presence of nutrients for  
 177 both cations and anions (Roy and Kashem, 2014). Soil EC indicates the mineralization of  
 178 organic matter in soil and many authors have found positive correlations between EC and  
 179 compounds from organic matter degradation in soil (Arthur et al., 2012; Gulser et al., 2010;  
 180 Medina et al., 2012). However, EC values were still below the upper limit of 4000  $\mu\text{S cm}^{-1}$   
 181 suggested for agricultural soils, even at 8% application rates (Arthur et al., 2012; Postel and  
 182 Starke, 1990; Rhoades et al., 1992).

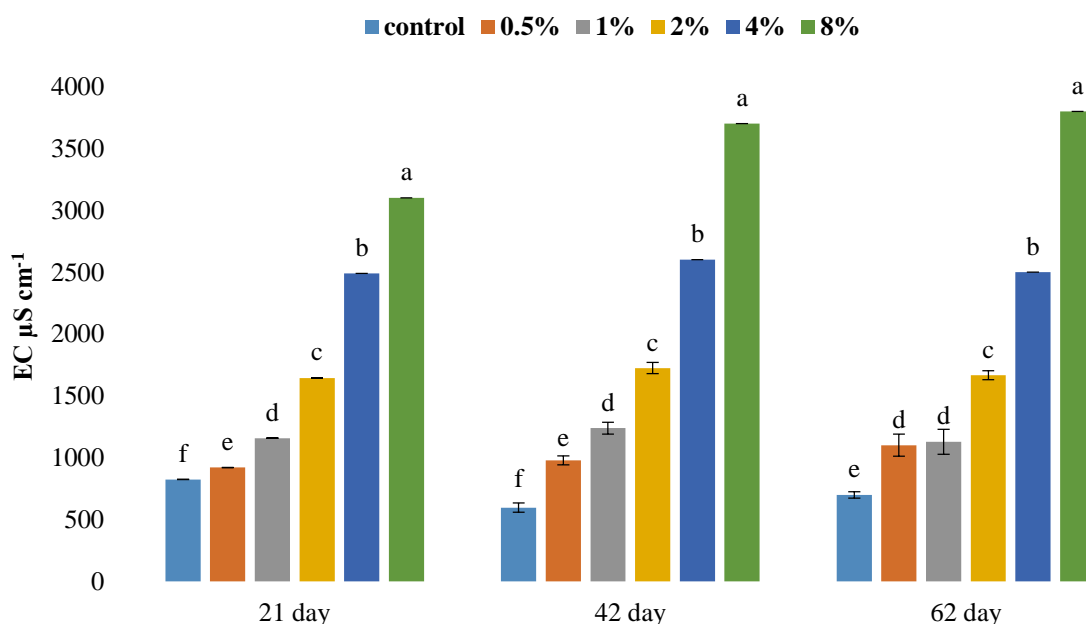

183  
 184 **Fig 3.** Effects of different rates of SMC applications on soil EC, Error bars indicate least significant difference  
 185 ( $P<0.05$ ). For additional information regarding results of one way ANOVA LSD test. 0.5, 1, 2, 4 and 8% SMC

186 **4.4 Soil organic carbon (SOC)**

187 The effects of SMC on SOC values of the soil are shown in Fig. 4. The SOC values  
 188 significantly increased with regard to elevated SMC application. Investigation performed at  
 189 incubation periods revealed that soil SOC existentially increased in response to the increment  
 190 in SMC dose, and the strongest effect were obtained with the doses 4% and 8%, where  
 191 differences in SOC values, depending on incubation periods and rates of SMC was noticed.  
 192 SOC content of soil increased with the increasing amendment rates of SMC. In general, SOC  
 193 content values in experiments increase with the increase of amendment rates of organic  
 194 materials. Soil organic carbon is known to play important roles in the maintenance, as well as  
 195 improvement of many soil properties, and thus, its concentration is often cited as one of the  
 196 major indicators for sustaining soil productivity. Increases in soil organic carbon contents can  
 197 be achieved by adding spent mushroom compost application (Courtney and Mullen, 2008;  
 198 Medina et al., 2012).

199 Organic amendments used in soil reclamation emanate from a variety of sources, including  
 200 agriculture, forestry, and urban areas. Of those generated by agriculture, livestock manure  
 201 from various species is the most prevalent. Other amendments derived from agriculture  
 202 include crop residues and spent mushroom compost. The rate of decomposition of organic  
 203 amendments and soil organic carbon remains over a long-term vary with the intrinsic quality  
 204 of the amendment (Lashermes et al., 2009; Novara et al., 2015). Carbon in organic  
 205 amendments was originally fixed by plants through photosynthesis (Larney and Angers,  
 206 2012). Soil organic carbon increases due to high organic carbon (Oo et al., 2015), soil  
 207 biological activity, and/or the root depth effect (Parras-Alcántara et al., 2015). Soil organic  
 208 matter content is one of the most important soil quality indicators of soil recovery (Mahmoud  
 209 and Abd El-Kader, 2015; Parras-Alcántara et al., 2015; Pulido Moncada et al., 2015) and it is

210 a good sign for soil quality (Gelaw et al., 2015). The quality of soil organic matter, soil  
 211 structure, the microbial activity, and the rainfall intensity are, in fact, important parameters  
 212 that should be evaluated and correlated to assess the fate of carbon during transportation  
 213 (Novara et al., 2016). Similar results were reported by a few other studies (Arthur et al., 2011;  
 214 Curtin and Mullen, 2007; Yazdanpanah et al., 2016).

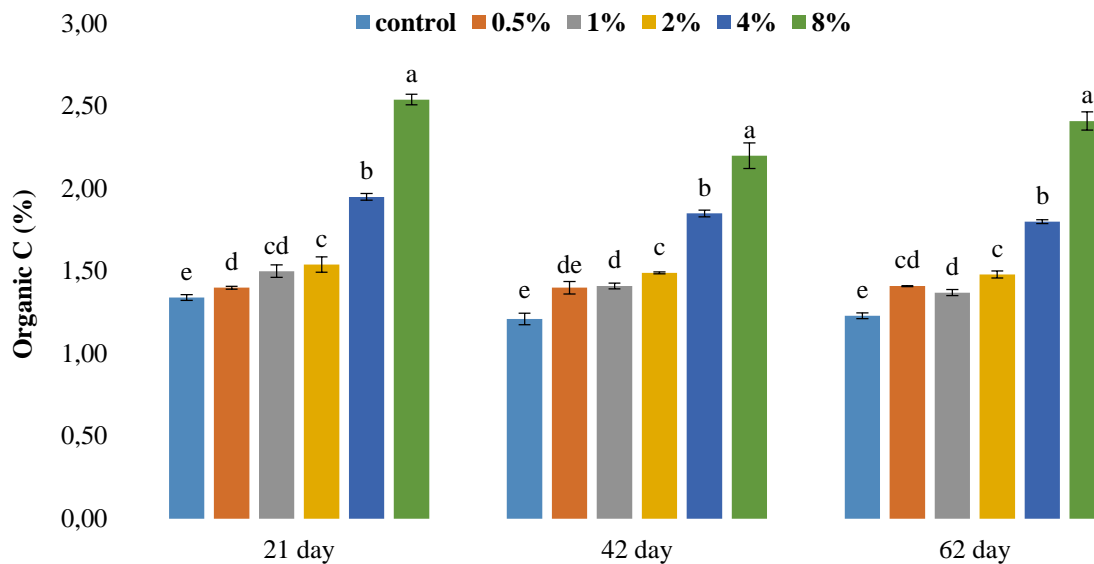

215 **Fig 4.** Effects of different rates of SMC applications on soil organic carbon, Error bars indicate least significant  
 216 difference ( $P < 0.05$ ). For additional information regarding results of one way ANOVA LSD test. 0.5, 1, 2, 4 and  
 217 8% SMC  
 218

#### 219 4.5 Total nitrogen (N)

220 The effects of SMC on total nitrogen values of the soil are shown in Fig. 5. The total nitrogen  
 221 values significantly increased with respect to elevated SMC application. According to the  
 222 investigations at 21, 42, and 62 days, one could note 0.5, 1, and 2% applications, which  
 223 resulted in significant increase, and the strongest effect obtained with the doses of 4% and  
 224 8%. The nitrogen content of the soil was closely dependent on the amendment rates of the  
 225 SMC. In general, the total nitrogen content of soil increased with increasing amendment rates  
 226 of SMC. Nitrogen content of the soil showed a significant increase, depending on the rate of  
 227 SMC amendments and suggesting that the incubation period was sufficient for nitrogen  
 228 mobilization of the materials applied. With regards to the nitrogen dynamics in the soil, the  
 229 addition of the SMC produced, in general, an increase in the organic N concentration  
 230 throughout the experiment, especially in comparison to the control soil (Medina et al., 2012).  
 231 It is believed that physical, chemical and biological properties of SMC (especially C/N  
 232 mineralization level and decomposition) may play roles in the mineralization of nitrogen from  
 233 organic materials during the incubation periods.



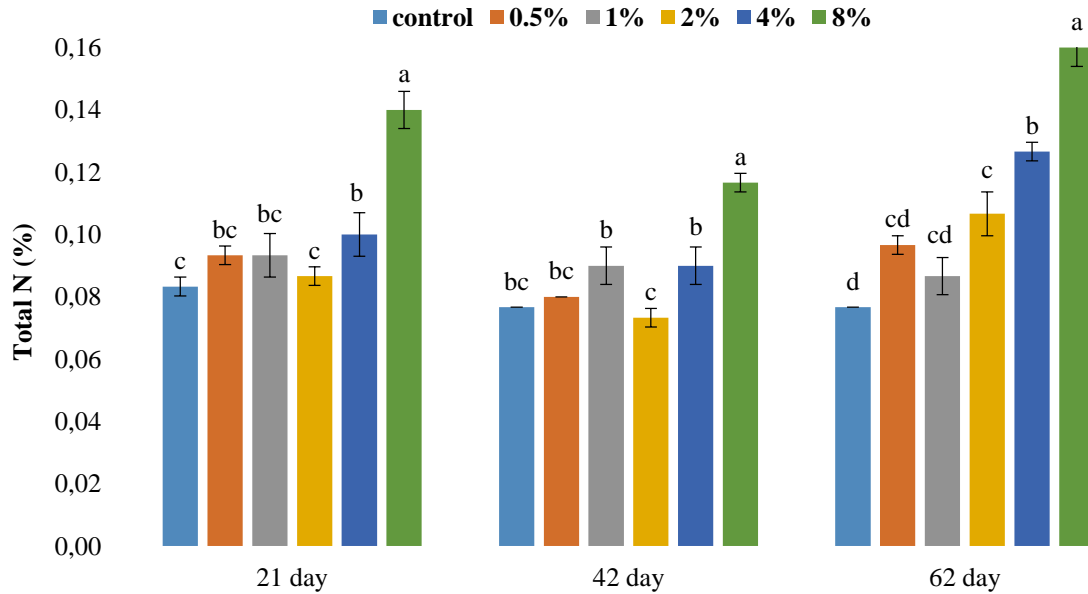

234  
 235 **Fig 5.** Effects of different rates of SMC applications on total nitrogen, Error bars indicate least significant  
 236 difference ( $P < 0.05$ ). For additional information regarding results of one way ANOVA LSD test. 0.5, 1, 2, 4 and  
 237 8% SMC

## 238 5 Conclusions

239 This study shows that the application spent mushroom compost can improve the stability of  
 240 the structure of soils. Physical and chemical properties of the soil, such as aggregate stability,  
 241 soil modulus of rupture, organic carbon, and total nitrogen were improved by SMC  
 242 amendment. SMC increased soil EC, with all treatments having EC values well below the  
 243 upper limit of  $4000 \mu\text{S cm}^{-1}$ , as suggested for agricultural soils (Arthur et al., 2012; Postel and  
 244 Starke, 1990; Rhoades et al., 1992). Soil aggregate stability and modulus of rupture were the  
 245 most dramatically affected by SMC application. The use of spent mushroom compost may  
 246 contribute to enhancing the level of organic carbon and nitrogen in the soil. In addition, the  
 247 results show that the spent mushroom compost application is an effective way to improve soil  
 248 physicochemical properties. This structural improvement has direct benefits for both the  
 249 farmers of degraded soils as well as mushroom growers who require a safe disposal method  
 250 for waste products.

## 251 Acknowledgements

252 The authors would you like to thanks Dr. Ali Sabır of Department of Horticulture, Faculty of  
 253 Agriculture, University of Selçuk for her helpful comments and Hamza Negiş of Department  
 254 of Soil Science and Plant Nutrition, Faculty of Agriculture, University of Selçuk for helpful  
 255 laboratory analysis.

## 256 References

257 Abiven, S., Menasseri, S., and Chenu, C.: The effects of organic inputs over time on soil  
 258 aggregate stability—A literature analysis, *Soil Biology and Biochemistry*, 41, 1-12,  
 259 doi:10.1016/j.soilbio.2008.09.015, 2009.

260 Aksakal, E. L., Sari, S., and Angin, I.: Effects of vermicompost application on soil  
261 aggregation and certain physical properties, *Land Degradation & Development*, doi:  
262 10.1002/ldr.2350, 2015.

263 Arthur, E., Cornelis, W., and Razzaghi, F.: Compost Amendment to sandy soil affects soil  
264 properties and greenhouse tomato productivity, *Compost Science & Utilization*, 20, 215-221,  
265 <http://dx.doi.org/10.1080/1065657X.2012.10737051>, 2012.

266 Arthur, E., Cornelis, W., Vermang, J., and De Rocker, E.: Amending a loamy sand with three  
267 compost types: impact on soil quality, *Soil Use and Management*, 27, 116-123, doi:  
268 10.1111/j.1475-2743.2010.00319.x, 2011.

269 Bal, L., Şeker, C., and Ersoy Gümüş, İ.: Kaymak Tabakası Oluşumuna Fiziko-Kimyasal  
270 Faktörlerin Etkileri, *SELÇUK TARIM VE GIDA BİLİMLERİ DERGİSİ*, 25, 96-103, 2012.

271 Boix-Fayos, C., Calvo-Cases, A., Imeson, A., and Soriano-Soto, M.: Influence of soil  
272 properties on the aggregation of some Mediterranean soils and the use of aggregate size and  
273 stability as land degradation indicators, *Catena*, 44, 47-67, doi:10.1016/S0341-  
274 8162(00)00176-4, 2001.

275 Bone, J., Barraclough, D., Eggleton, P., Head, M., Jones, D., and Voulvoulis, N.: Prioritising  
276 soil quality assessment through the screening of sites: the use of publicly collected data, *Land*  
277 *Degradation & Development*, 25, 251-266, doi: 10.1002/ldr.2138, 2014.

278 Bronick, C. J. and Lal, R.: Soil structure and management: a review, *Geoderma*, 124, 3-22,  
279 2005.

280 Candemir, F. and Gülser, C.: Effects of different agricultural wastes on some soil quality  
281 indexes in clay and loamy sand fields, *Communications in soil science and plant analysis*, 42,  
282 13-28, doi: 10.1080/00103624.2011.528489, 2010.

283 Caravaca, F., Masciandaro, G., and Ceccanti, B.: Land use in relation to soil chemical and  
284 biochemical properties in a semiarid Mediterranean environment, *Soil and Tillage Research*,  
285 68, 23-30, 2002.

286 Carrizo, M. E., Alesso, C. A., Cosentino, D., and Imhoff, S.: Aggregation agents and  
287 structural stability in soils with different texture and organic carbon contents, *Scientia*  
288 *Agricola*, 72, 75-82, <http://dx.doi.org/10.1590/0103-9016-2014-0026>, 2015.

289 Cassel, D. and Nielsen, D.: Field capacity and available water capacity, *Methods of Soil*  
290 *Analysis: Part 1—Physical and Mineralogical Methods*, 1986. 901-926, 1986.

291 Cerdà, A.: Soil aggregate stability under different Mediterranean vegetation types, *Catena*, 32,  
292 73-86, doi:10.1016/S0341-8162(98)00041-1, 1998.

293 Chan, K., Heenan, D., and So, H.: Sequestration of carbon and changes in soil quality under  
294 conservation tillage on light-textured soils in Australia: a review, *Animal Production Science*,  
295 43, 325-334, doi:10.1071/EA02077, 2003.

296 Cooperation, L.: Truspec carbon/nitrogen determinator, Leco Cooperation, 3000, 2003.

297 Courtney, R. and Mullen, G.: Soil quality and barley growth as influenced by the land  
298 application of two compost types, *Bioresource Technology*, 99, 2913-2918,  
299 doi:10.1016/j.biortech.2007.06.034, 2008.

300 Curtin, J. and Mullen, G.: Physical properties of some intensively cultivated soils of Ireland  
301 amended with spent mushroom compost, *Land Degradation & Development*, 18, 355-368,  
302 doi: 10.1002/ldr.763, 2007.

303 Doran, J., Safley, M., Pankhurst, C., Doube, B., and Gupta, V.: Defining and assessing soil  
304 health and sustainable productivity, *Biological indicators of soil health.*, 1997. 1-28, 1997.

305 Ferreras, L., Gómez, E., Toresani, S., Firpo, I., and Rotondo, R.: Effect of organic  
306 amendments on some physical, chemical and biological properties in a horticultural soil,  
307 *Bioresource Technology*, 97, 635-640, doi:10.1016/j.biortech.2005.03.018, 2006.

308 Gee, G. W., Bauder, J. W., and Klute, A.: Particle-size analysis, *Methods of soil analysis. Part*  
309 *1. Physical and mineralogical methods*, 1986. 383-411, 1986.

310 Gelaw, A. M., Singh, B., and Lal, R.: Organic carbon and nitrogen associated with soil  
311 aggregates and particle sizes under different land uses in Tigray, Northern Ethiopia, *Land*  
312 *Degradation & Development*, 26, 690-700, doi: 10.1002/ldr.2261, 2015.

313 Grandy, A. S., Porter, G. A., and Erich, M. S.: Organic amendment and rotation crop effects  
314 on the recovery of soil organic matter and aggregation in potato cropping systems, *Soil*  
315 *Science Society of America Journal*, 66, 1311-1319, doi:10.2136/sssaj2002.1311, 2002.

316 Gulser, C., Demir, Z., and Ic, S.: Changes in some soil properties at different incubation  
317 periods after tobacco waste application, 2010.

318 Gümüs, I. and Şeker, C.: Influence of humic acid applications on modulus of rupture,  
319 aggregate stability, electrical conductivity, carbon and nitrogen content of a crusting problem  
320 soil, *Solid Earth*, 6, 1231-1236, doi:10.5194/se-6-1231-2015, 2015.

321 Hueso-González, P., Martínez-Murillo, J. F., and Ruiz-Sinoga, J. D.: The impact of organic  
322 amendments on forest soil properties under Mediterranean climatic conditions, *Land*  
323 *Degradation & Development*, 25, 604-612, doi: 10.1002/ldr.2296, 2014.

324 Jaiarree, S., Chidthaisong, A., Tangtham, N., Polprasert, C., Sarobol, E., and Tyler, S.:  
325 Carbon budget and sequestration potential in a sandy soil treated with compost, *Land*  
326 *Degradation & Development*, 25, 120-129, doi: 10.1002/ldr.1152, 2014.

327 Karlen, D., Mausbach, M., Doran, J., Cline, R., Harris, R., and Schuman, G.: Soil quality: a  
328 concept, definition, and framework for evaluation (a guest editorial), *Soil Science Society of*  
329 *America Journal*, 61, 4-10, 1997.

330 Kemper, W. and Rosenau, R.: Aggregate stability and size distribution. In 'Methods of Soil  
331 analyses. Part 1'. 2nd Edn.(Ed. A. Klute.) *Agron. Monogr. No. 9*, Am. Soc. Agron.: Madison,  
332 Wis, 1986. 1986.

333 Larney, F. J. and Angers, D. A.: The role of organic amendments in soil reclamation: a  
334 review, *Canadian Journal of Soil Science*, 92, 19-38, 2012.

335 Lashermes, G., Nicolardot, B., Parnaudeau, V., Thuries, L., Chaussod, R., Guillotin, M.,  
336 Lineres, M., Mary, B., Metzger, L., and Morvan, T.: Indicator of potential residual carbon in  
337 soils after exogenous organic matter application, *European Journal of Soil Science*, 60, 297-  
338 310, doi: 10.1111/j.1365-2389.2008.01110.x, 2009.

339 Mahmoud, E. and Abd El-Kader, N.: Heavy metal immobilization in contaminated soils using  
340 phosphogypsum and rice straw compost, *Land Degradation & Development*, 26, 819-824,  
341 doi: 10.1002/ldr.2288, 2015.

342 Medina, E., Paredes, C., Bustamante, M., Moral, R., and Moreno-Caselles, J.: Relationships  
343 between soil physico-chemical, chemical and biological properties in a soil amended with  
344 spent mushroom substrate, *Geoderma*, 173, 152-161, doi:10.1016/j.geoderma.2011.12.011,  
345 2012.

346 MGM: Meteoroloji Genel Müdürlüğü Resmi İstatistikler (İllerimize Ait İstatistiki Veriler).  
347 2015.

348 Minitab, C.: Minitab reference manual (Release 7.1), State Coll., PA16801, USA, 1991. 1991.

349 Moreno, M. T., Carmona, E., Santiago, A., Ordovás, J., and Delgado, A.: Olive husk compost  
350 improves the quality of intensively cultivated agricultural soils, *Land Degradation &*  
351 *Development*, 27, 449-459, doi: 10.1002/ldr.2410, 2016.

352 Mukherjee, A., Zimmerman, A., Hamdan, R., and Cooper, W.: Physicochemical changes in  
353 pyrogenic organic matter (biochar) after 15 months of field aging, *Solid Earth*, 5, 693,  
354 doi:10.5194/se-5-693-2014, 2014.

355 Murphy, C.: Spent mushroom compost as an amendment on tillage land, M.Sc., University of  
356 Limerick: Ireland 2001.

357 Novara, A., Keesstra, S., Cerdà, A., Pereira, P., and Gristina, L.: Understanding the role of  
358 soil erosion on CO<sub>2</sub>-C loss using 13 C isotopic signatures in abandoned Mediterranean  
359 agricultural land, *Science of the Total Environment*, 550, 330-336,  
360 doi:10.1016/j.scitotenv.2016.01.095, 2016.

361 Novara, A., Rühl, J., La Mantia, T., Gristina, L., La Bella, S., and Tuttolomondo, T.: Litter  
362 contribution to soil organic carbon in the processes of agriculture abandon, *Solid Earth*, 6,  
363 425, doi:10.5194/se-6-425-2015, 2015.

364 Oo, A., Iwai, C., and Saenjan, P.: Soil properties and maize growth in saline and nonsaline  
365 soils using cassava-industrial waste compost and vermicompost with or without earthworms,  
366 *Land degradation & development*, 26, 300-310, doi: 10.1002/ldr.2208, 2015.

367 Parras-Alcántara, L., Lozano-García, B., and Galán-Espejo, A.: Soil organic carbon along an  
368 altitudinal gradient in the Despeñaperros Natural Park, southern Spain, *Solid Earth*, 6, 125,  
369 doi:10.5194/se-6-125-2015, 2015.

370 Paz-Ferreiro, J. and Fu, S.: Biological indices for soil quality evaluation: perspectives and  
371 limitations, *Land Degradation & Development*, doi: 10.1002/ldr.2262, 2013.

372 Peng, F., Quangang, Y., Xue, X., Guo, J., and Wang, T.: Effects of rodent-induced land  
373 degradation on ecosystem carbon fluxes in an alpine meadow in the Qinghai-Tibet Plateau,  
374 China, *Solid Earth*, 6, 303, doi:10.5194/se-6-303-2015, 2015.

375 Postel, S. and Starke, L.: Saving water for agriculture, *State of the World.*, 1990. 39-58, 1990.

376 Pulido Moncada, M., Gabriels, D., Cornelis, W., and Lobo, D.: Comparing aggregate stability  
377 tests for soil physical quality indicators, *Land Degradation & Development*, 26, 843-852, doi:  
378 10.1002/ldr.2225, 2015.

379 Reeve, R.: Modulus of rupture, *Methods of Soil Analysis. Part 1. Physical and Mineralogical*  
380 *Properties, Including Statistics of Measurement and Sampling*, 1965. 466-471, 1965.

381 Rhoades, J., Sparks, D., Page, A., Helmke, P., Loeppert, R., Soltanpour, P., Tabatabai, M.,  
382 Johnston, C., and Sumner, M.: Salinity: Electrical conductivity and total dissolved solids,  
383 *Methods of soil analysis. Part 3-chemical methods.*, 1996. 417-435, 1996.

384 Rhoades, J. D., Kandiah, A., and Mashali, A. M.: The use of saline waters for crop  
385 production, *FAO Rome*, 1992.

386 Richards, L.: Modulus of rupture as an index of crusting of soil, *Soil Science Society of*  
387 *America Journal*, 17, 321-323, 1953.

388 Roy, S. and Kashem, M. A.: Effects of Organic Manures in Changes of Some Soil Properties  
389 at Different Incubation Periods, *Open Journal of Soil Science*, doi:10.4236/ojss.2014.43011,  
390 2014.

391 Seker, C.: Effects of selected amendments on soil properties and emergence of wheat  
392 seedlings, *Canadian journal of soil science*, 83, 615-621, doi: 10.4141/S02-080, 2003.

393 Shiralipour, A., McConnell, D. B., and Smith, W. H.: Physical and chemical properties of  
394 soils as affected by municipal solid waste compost application, *Biomass and Bioenergy*, 3,  
395 261-266, doi:10.1016/0961-9534(92)90030-T, 1992.

396 Staff, S. S.: Keys to soil taxonomy, Department of Agriculture: Natural Resources  
397 Conservation Service, 2006.

398 Şeker, C. and Karakaplan, S.: Konya ovasında toprak özellikleri ile kırılma değerleri  
399 arasındaki ilişkiler, *Tr. J. of Agriculture and Forestry*, 29, 183-190, 1999.

400 Thomas, G.: Soil pH and soil acidity. In 'Methods of soil analysis. Part 3. Chemical  
401 methods'.(Ed. DL Sparks) pp. 475–490, Soil Science Society of America: Madison, WI,  
402 1996. 1996.

403 Wu, Y., Xu, G., and Shao, H.: Furfural and its biochar improve the general properties of a  
404 saline soil, *Solid Earth*, 5, 665, doi:10.5194/se-5-665-2014, 2014.

405 Yazdanpanah, N., Mahmoodabadi, M., and Cerdà, A.: The impact of organic amendments on  
406 soil hydrology, structure and microbial respiration in semiarid lands, *Geoderma*, 266, 58-65,  
407 doi:10.1016/j.geoderma.2015.11.032, 2016.

408 Yilmaz, E.: Changes of some soil properties by agricultural processing waste (soybean pulp)  
409 amendment, *Journal of Food, Agriculture & Environment*, 8, 1057-1060, 2010.

410 Yu, Y. and Jia, Z.: Changes in soil organic carbon and nitrogen capacities of *Salix cheilophila*  
411 Schneid along a revegetation chronosequence in semi-arid degraded sandy land of the Gonghe  
412 Basin, Tibet Plateau, *Solid Earth*, 5, 1045, doi:10.5194/se-5-1045-2014, 2014.

413
