# Supplementary material for: Effects of Spent Mushroom Compost on Physicochemical Properties of Degraded Soil
Source: Copernicus journal article supplement (doi:10.5194/se-2016-122), 2016-09-30
Supplement: Supplementary file [file se-2016-122-AC4-supplement.pdf]

1 **Effects of Spent Mushroom Compost Application Physicochemical Properties of**  
2 **Degraded Soil**

3 İlknur Gümüş

4 Department of Soil Science and Plant Nutrition, Faculty of Agriculture, University of Selçuk,  
5 42031 Konya, Turkey

6 Tel: +903322232932 Fax: +903322410108

7 Correspondence to: İlknur Gümüş,\*ersoy@selcuk.edu.tr

8 Cevdet ŞEKER

9 Department of Soil Science and Plant Nutrition, Faculty of Agriculture, University of Selçuk,  
10 42031 Konya, Turkey

11 Tel: +903322232928 Fax: +903322410108

12 **Abstract**

13 Land and laboratory studies show that the application of organic amendments into the soil  
14 improves the physicochemical properties of it. The study aims to study explore spent  
15 mushroom compost (SMC) application on the physicochemical properties of a weak-  
16 structured and degraded soil. The approach involved establish a pot experiment with spent  
17 mushroom compost applications (control, 0.5%, 1%, 2%, 4% and 8%), soil samples were  
18 incubated at field capacity for 21, 42, and 62 days. Spent mushroom compost applications into  
19 the soil significantly increased the aggregate stability (AS) and decreased the modulus of  
20 rupture. Application of SMC at the rate of 1%, 2%, 4%, and 8% were significantly increased  
21 the total nitrogen (N) and soil organic carbon (SOC) contents of the degraded soil at all  
22 incubation periods ( $p < 0.05$ ). The results obtained from this study clearly indicated that the  
23 application of spent mushroom compost reduces the modulus of rupture and ameliorates the  
24 increase of total nitrogen and soil organic carbon content.

25 Keywords: Aggregate stability, modulus of rupture, soil aggregation, soil structure, spent mushroom compost

26 **1 Introduction**

27 Soil quality is defined as the capacity of the soil to function within natural or managed  
28 ecosystem and land use boundaries, sustain biological productivity, to promote the quality of  
29 air and water environments, and to maintain plant, animal and human health (Doran et al.,  
30 1997; Karlen et al., 1997). Physical and chemical attributes are the main indicators used to  
31 assess soil quality (Bone et al., 2014; Paz-Ferreiro and Fu, 2013; Pulido Moncada et al.,  
32 2015). Soil quality is threatened by intensive management of the available urbanization and  
33 agricultural land, and by the increase in human activities (Paz-Ferreiro and Fu, 2013). Soil  
34 quality is another important aspect closely related to soil degradation. Soil degradation  
35 decreases land productivity (Yu and Jia, 2014). Degradation of land can be divided into three  
36 types: arid, semi-arid, and sub-humid dry areas from various factors, including climatic

37 variations and human activities (Yu and Jia, 2014). Soil degradation problem is particularly  
38 serious in the Mediterranean areas, where the effects of anthropogenic activities add to the  
39 problems caused by prolonged periods of drought and intense and irregular rainfall (Hueso-  
40 González et al., 2014). Vegetation degradation, land use change, and soil are among the  
41 degradation factors that causes soil carbon and nitrogen losses (Moreno et al., 2016; Peng et  
42 al., 2015). The reduction in soil structure is considered as a form of soil degradation (Chan et  
43 al., 2003), and is always with regards to land use and soil crop management practices.

44 Physical and structural soil degradation occurs mostly due to the decrease in soil organic  
45 matter caused by excessive soil cultivation (Grandy et al., 2002). Şeker and Karakaplan  
46 (1999) reported that the loss of organic matter is generally associated with a decrease in soil  
47 porosity and wet aggregate stability, as well as the increase in soil strength indices. Soil water  
48 movement and retention, crusting, root penetration, crop yield, erosion, and nutrient recycling  
49 are influenced by soil structure (Bal et al., 2012; Bronick and Lal, 2005; Seker, 2003).  
50 Organic materials are important soil additives that help to improve soil physical, chemical,  
51 and biological properties. Organic materials can improve the fertility of soil and soil  
52 amelioration ( Alagöz and Erdem, 2009; Wu et al., 2014). Besides good yield, these organic  
53 materials have been beneficial for soil chemical and physical fertility and stability that are  
54 possible due to organic matter (Mukherjee et al., 2014). Organic materials could be applied to  
55 soils to increase their organic matter contents and restore their physical properties, including  
56 soil aggregate stability (Annabi et al., 2011; Özdemir et al., 2007). Soil physical condition can  
57 be improved by amending soils with organic matter. Application of organic materials  
58 increases soil organic matter content and improves soil physical properties ( Yakupoğlu and  
59 Özdemir, 2012). Sustaining the productivity of soils is important, particularly in semi-arid  
60 regions (such as Turkey) where there is low input of organic materials (Gümüş and Şeker,  
61 2015).

62 Mushroom cultivation has recently become very popular in Turkey, and is a promising new  
63 industry, with many new businesses developing every year. Mushroom production in Turkey  
64 is separated into two components: compost production and mushroom cultivation. Total fresh  
65 mushroom production of Turkey has increased 33-fold in the last 24 years, from about 19.501  
66 tons in 2009 to about 39.495 tons in 2015 (Erler and Polat, 2008; TÜİK, 2015). Compost  
67 application to agricultural soil has been widely practiced as one of the approaches to improve  
68 crop productivity and soil fertility (Jaiarree et al., 2014). Spent mushroom compost can be  
69 used in organic farming to improve soil water infiltration, water holding capacity,  
70 permeability, and aeration. Composts provide a stabilized form of organic matter that  
71 improves the physical properties of soils (Zhang and Sun, 2014) by increasing both nutrient  
72 and water holding capacity, total pore space, aggregate stability, erosion resistance,  
73 temperature insulation, and the decreasing apparent soil density (Shiralipour et al., 1992).

74 The objective of this study is to indicate the effects of SPM application to degraded soil with  
75 specific emphasis on aggregate stability, the modulus of rupture, electrical conductivity (EC),  
76 nitrogen, and organic carbon.

## 77 **2 Materials and Methods**

78 Soil was collected from a problematic plot in the Agricultural Faculty of Selçuk University  
79 experiment station (0-20 cm soil depth) near the Konya Sarıcalar-Village located in central  
80 Anatolia, Turkey ( latitude of 38° 05' 56" N, longitude of 32° 36' 29" E, 1009 m above mean  
81 sea level). The climate is semi-arid, with an annual precipitation of 379.38 mm, an annual  
82 mean temperature of 11.5 °C, and an annual mean evaporation of 1226.4 mm (MGM, 2015).  
83 Soil moisture and temperature regimes are xeric and mesic, respectively, according to the  
84 climate data (Staff, 2006). Soil was classified as Fulivent (Staff, 2006). The soil sample used  
85 in this study has certain problems, such as insufficient seedling emergency, low aggregate  
86 stability, crusting problem, and low organic matter content (Bal et al., 2012). The area has a  
87 typically rain-fed attribute with cultivation practices and various crops such as grains, sugar  
88 beet, and corn with fruit trees of various ages. A portion of the land is located in the fruits  
89 trees of different ages and types. The spent mushroom compost (SMC) used in the present  
90 study were obtained from private companies dealing with mass mushroom production located  
91 in Konya, Turkey.

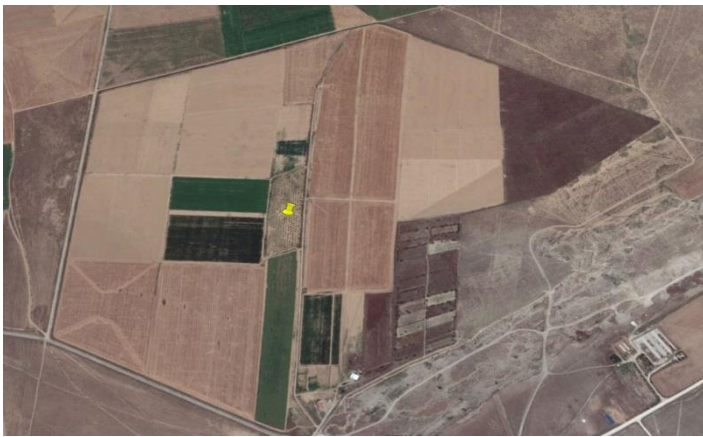

92

93 **Figure 1.** Geographical location of the Agricultural Faculty of Selçuk University experiment station.

94 The experiment was carried out in a completely randomized plot design with three  
95 replications and conducted under laboratory conditions as a pot experiment. Surface soil  
96 samples (0-20 cm) were air-dried, ground, passed through a 2 mm sieve and mixed  
97 homogeneously. Firstly, soil samples (2000 g) were placed in each pot (dimensions of pot;  
98 13.5 cm x 17 cm). Six level of SMC, (0% (as control), 0.5%, 1%, 2%, 4%, and 8% by weight)  
99 were incubated. During the incubation period, the soil moisture level in the pots was  
100 maintained at field capacity. After various incubation periods (21, 42 and 62 days), the soil  
101 samples in each pot were mixed to ensure homogeneity in soil sub-sample. The soils were  
102 then sub-sampled (250 g) for analyses. Twenty first, 42<sup>nd</sup> and 62<sup>nd</sup> days of incubation periods,  
103 the samples were analyzed with three replications.

104 Particle-size distribution was determined by the hydrometer method (Gee et al., 1986). The  
105 moisture contents at field capacity and wilting point were determined with a pressure plate  
106 apparatus (Cassel and Nielsen, 1986) at -33 and -1500 kPa, respectively. Soil pH and EC  
107 values were determined by using a glass-calomel electrode in a 1:2.5 mixture (w/v) of soil and  
108 water (Rhoades et al., 1996; Thomas, 1996). Soil organic carbon was determined on sample  
109 ground to pass through a 0.5 mm sieve by the use of TruSpec CN Carbon/Nitrogen

110 Determinator (Cooperation, 2003). The modulus of rupture was determined at 0.5 kPa  
 111 sensitivity by the procedure of Richards (1953) using briquettes prepared in moulds made  
 112 from mild steel of rectangular cross-section, and with interior dimensions of  $7 \times 3.5 \times 1$  cm.  
 113 The briquettes were prepared by using sieved subsoil samples ( $< 2$  mm), taken from each pot,  
 114 which were then placed in a soaking tank of distilled water filled to the upper surface of the  
 115 mould. They were allowed to stand for 1 h, and then dried at  $50^{\circ}\text{C}$ . The briquettes were  
 116 broken by a downward motion of a bar of triangular cross section, the force being applied by  
 117 water additions to a vessel. The modulus of rupture was calculated as follows:

118 
$$MR: 3 F L / 2 b d^2 10.000$$

119 Where  $MR$  is the modulus of rupture (kPa),  $f$  is the breaking force in grams of water  $\times 980$ ,  $L$   
 120 is the distance between the lower supports in cm,  $b$  is the width of the briquette in cm, and  $d$  is  
 121 the thickness of the briquette in cm (Reeve, 1965; Richards, 1953). Aggregate stability was  
 122 determined by immersing the sieves containing the aggregate samples (between 1-2mm size)  
 123 in distilled water at up and down oscillating on screens through 55 mm at 30 strokes min<sup>-1</sup> for  
 124 5 min (Kemper and Rosenau, 1986).

### 125 3 Statistical analyses

126 The data collected were subjected one-way analysis of variance (ANOVA) test and treatment  
 127 means were compared at  $p < 0.05$  using the F-LSD significant difference test (Minitab, 1991).

### 128 4 Results and Discussion

129 Some of the physical and chemical properties of soil and spent mushroom compost (SMC) are  
 130 shown in Tables I and II.

131 **Table 1.** Some properties of the soil

| Soil properties                                    | Values | Soil properties                    | Values |
|----------------------------------------------------|--------|------------------------------------|--------|
| Sand (%)                                           | 6.65   | Field capacity (%)                 | 35.6   |
| Silt (%)                                           | 34.17  | Wilting point (%)                  | 16.19  |
| Clay (%)                                           | 59.18  | Aggregate stability (%)            | 10.83  |
| Textural class                                     | C      | Bulk density (g cm <sup>-3</sup> ) | 1.09   |
| pH (H <sub>2</sub> O, 1:2.5)                       | 7.96   |                                    |        |
| EC (H <sub>2</sub> O, 1:2.5) $\mu\text{S cm}^{-1}$ | 479    |                                    |        |
| C (%)                                              | 1.35   |                                    |        |
| Carbonates (%)                                     | 11.58  |                                    |        |

132

133 **Table 2.** Properties of the Spent Mushroom Compost (SMC)

| Properties                                         | SMC   |
|----------------------------------------------------|-------|
| pH (H <sub>2</sub> O, 1:2.5)                       | 7.36  |
| EC (H <sub>2</sub> O, 1:2.5) $\mu\text{S cm}^{-1}$ | 5390  |
| C (%)                                              | 38.80 |
| N (%)                                              | 2.61  |
| C/N                                                | 14.88 |
| Organic matter (%)                                 | 66.89 |

134

#### 135 4.1 Aggregate stability (AS)

136 Effects of SMC application on aggregate stability are given in Fig. 2. Aggregate stability  
137 values of the soil treated with different doses SMC application was measured after 21, 42, and  
138 62 days incubation periods, respectively. The effects of SMC application on soil aggregate  
139 stability values were significant. Generally, aggregate stability increased with SMC  
140 applications. These results may be explained by aggregate stability and soil organic matter  
141 that are two parameters and indicators for sustaining soil productivity. Aggregate stability is a  
142 key factor of soil fertility (Abiven et al., 2009). The recovery in aggregate stability of such  
143 physically degraded soils is important, as those studied was expected to follow the  
144 incorporation of any cementing agent, such as SMC (Curtin and Mullen, 2007). Aggregate  
145 stability decreased at 42 and 62 days of incubation periods in all SMC rates, when compared  
146 to a 21-day incubation period. Aggregate size distribution and stability can be used as an  
147 indicator of soil condition or degradation (Boix-Fayos et al., 2001). Soil organic matter seems  
148 to be the most important factor, in order to determine stabilizing soil aggregates (Aksakal et  
149 al., 2015; Candemir and Gülser, 2010; Cerdà, 1998). Organic matter shows a direct  
150 relationship with aggregate stability (Cerdà, 1998). In addition, after the incubation period, as  
151 a result of mechanical mixing practices, the aggregate stability of the soil samples decreased  
152 (Seker, 2003). Similarly, it is reported that there is an increase in the soils organic carbon  
153 concentration after organic matter application, and thus, a higher formation of stable  
154 aggregates (Arthur et al., 2011; Ferreras et al., 2006; Gümüs and Şeker, 2015; Murphy, 2001).  
155 Organic materials applications could be used for the improvement of physical properties of  
156 degraded soils (Turgut and Köse, 2016).

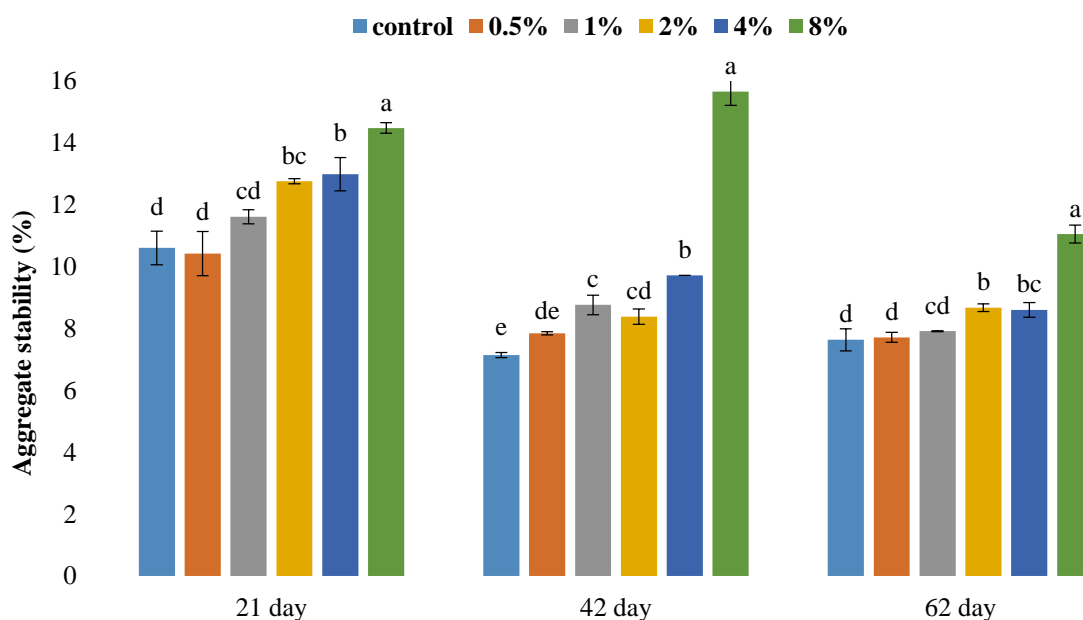

157 **Fig 2.** Effects of different rates of SMC applications on aggregate stability, Error bars indicate least significant  
158 difference ( $P<0.05$ ). For additional information regarding results of one way ANOVA LSD test. 0.5, 1, 2, 4 and  
159 8% SMC  
160

#### 161 4.2 Soil modulus of rupture

162 Effects of SMC application on soil modulus of rupture are shown in Fig. 3. All the SMC  
 163 applications resulted in significantly lower modulus of rupture at 21<sup>st</sup> and 42<sup>nd</sup> days, except  
 164 for the 62<sup>nd</sup> day incubation. In general, soil modulus of rupture decreased with the increasing  
 165 application rates of SMC. The effects were especially due to the high organic matter contents  
 166 of SPM that improved soil structure mechanically (Gümüs and Şeker, 2015; Seker, 2003).  
 167 The SMC used in the study contains significant amounts of organic substances. Reason for its  
 168 modulus of rupture can be related to the inhibitory effects of SPC on the tight unity formation  
 169 of soil particles. The structural stabilization is related to organic matter inputs (Caravaca et al.,  
 170 2002; Ferreras et al., 2006), and thus, a significant decrease in the modulus of rupture was  
 171 attained with the application rate of SMC. These results may be explained through the  
 172 formation of aggregates during the incubation periods. The modulus of rupture was reduced  
 173 because of the increase in organic amendments, which allowed less cohesion among the soil  
 174 particles (Seker, 2003). Organic amendments are known to decrease bulk density and particle  
 175 in soil (Moreno et al., 2016). The absence of such effects in 62 days can be related to the  
 176 decrease in aggregate stability and organic substances. This, most probably, resulted from the  
 177 breakdown of soil decomposition and the aggregates of soil organic matter by mixing pot  
 178 contents to simulate repeated cultivation (Carrizo et al., 2015; Seker, 2003).

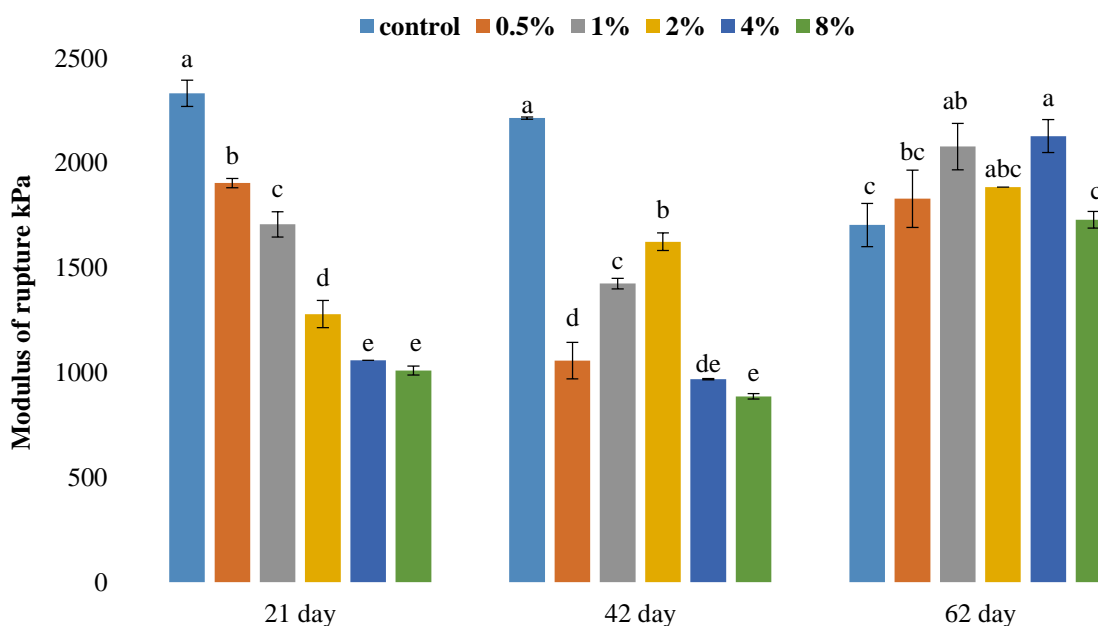

179  
 180 **Fig 3.** Effects of different rates of SMC applications on soil modulus of rupture, Error bars indicate least  
 181 significant difference ( $P<0.05$ ). For additional information regarding results of one way ANOVA LSD test. 0.5,  
 182 1, 2, 4 and 8% SMC

### 183 4.3 EC

184 The effects of SMC on EC values of the soil are given in Fig. 4. The EC values significantly  
 185 increased with respect to elevated SMC application. According to investigation soil, EC  
 186 gradually increased with incubation periods significantly, and the magnitude of such increase  
 187 was higher in the SMC-amended soil than the control soil. The increasing EC values in an

188 experiment for different doses of SMC application may be explained by the high content of  
 189 solutes nutrient composition of organic fragments, and the remains from the materials during  
 190 incubation periods (Yilmaz, 2010). EC can serve as a measure for the presence of nutrients for  
 191 both cations and anions (Roy and Kashem, 2014). Soil EC indicates the mineralization of  
 192 organic matter in soil and many authors have found positive correlations between EC and  
 193 compounds from organic matter degradation in soil (Arthur et al., 2012; Gulser et al., 2010;  
 194 Medina et al., 2012). However, EC values were still below the upper limit of 4000  $\mu\text{S cm}^{-1}$   
 195 suggested for agricultural soils, even at 8% application rates (Arthur et al., 2012; Postel and  
 196 Starke, 1990; Rhoades et al., 1992).

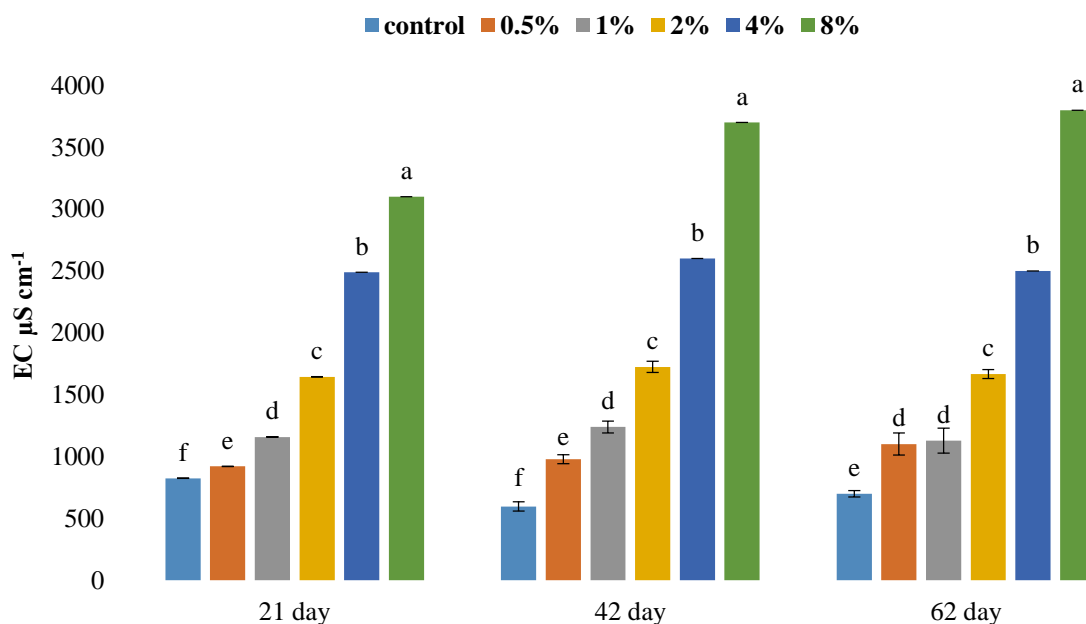

197  
 198 **Fig 4.** Effects of different rates of SMC applications on soil EC, Error bars indicate least significant difference  
 199 ( $P < 0.05$ ). For additional information regarding results of one way ANOVA LSD test. 0.5, 1, 2, 4 and 8% SMC

#### 200 4.4 Soil organic carbon (SOC)

201 The effects of SMC on SOC values of the soil are shown in Fig. 5. The SOC values  
 202 significantly increased with regard to elevated SMC application. Investigation performed at  
 203 incubation periods revealed that soil SOC existentially increased in response to the increment  
 204 in SMC dose, and the strongest effect were obtained with the doses 4% and 8%, where  
 205 differences in SOC values, depending on incubation periods and rates of SMC was noticed.  
 206 SOC content of soil increased with the increasing amendment rates of SMC. In general, SOC  
 207 content values in experiments increase with the increase of amendment rates of organic  
 208 materials. Soil organic carbon is known to play important roles in the maintenance, as well as  
 209 improvement of many soil properties, and thus, its concentration is often cited as one of the  
 210 major indicators for sustaining soil productivity. Increases in soil organic carbon contents can  
 211 be achieved by adding spent mushroom compost application (Courtney and Mullen, 2008;  
 212 Medina et al., 2012).

213 Organic amendments used in soil reclamation emanate from a variety of sources, including  
 214 agriculture, forestry, and urban areas. Of those generated by agriculture, livestock manure  
 215 from various species is the most prevalent. Other amendments derived from agriculture  
 216 include crop residues and spent mushroom compost. The rate of decomposition of organic  
 217 amendments and soil organic carbon remains over a long-term vary with the intrinsic quality  
 218 of the amendment (Lashermes et al., 2009; Novara et al., 2015). Carbon in organic  
 219 amendments was originally fixed by plants through photosynthesis (Larney and Angers,  
 220 2012). Soil organic carbon increases due to high organic carbon (Oo et al., 2015), soil  
 221 biological activity, and/or the root depth effect (Parras-Alcántara et al., 2015). Soil organic  
 222 matter content is one of the most important soil quality indicators of soil recovery (Mahmoud  
 223 and Abd El-Kader, 2015; Parras-Alcántara et al., 2015; Pulido Moncada et al., 2015) and it is  
 224 a good sign for soil quality (Gelaw et al., 2015). The quality of soil organic matter, soil  
 225 structure, the microbial activity, and the rainfall intensity are, in fact, important parameters  
 226 that should be evaluated and correlated to assess the fate of carbon during transportation  
 227 (Novara et al., 2016). Similar results were reported by a few other studies (Arthur et al., 2011;  
 228 Curtin and Mullen, 2007; Yazdanpanah et al., 2016).

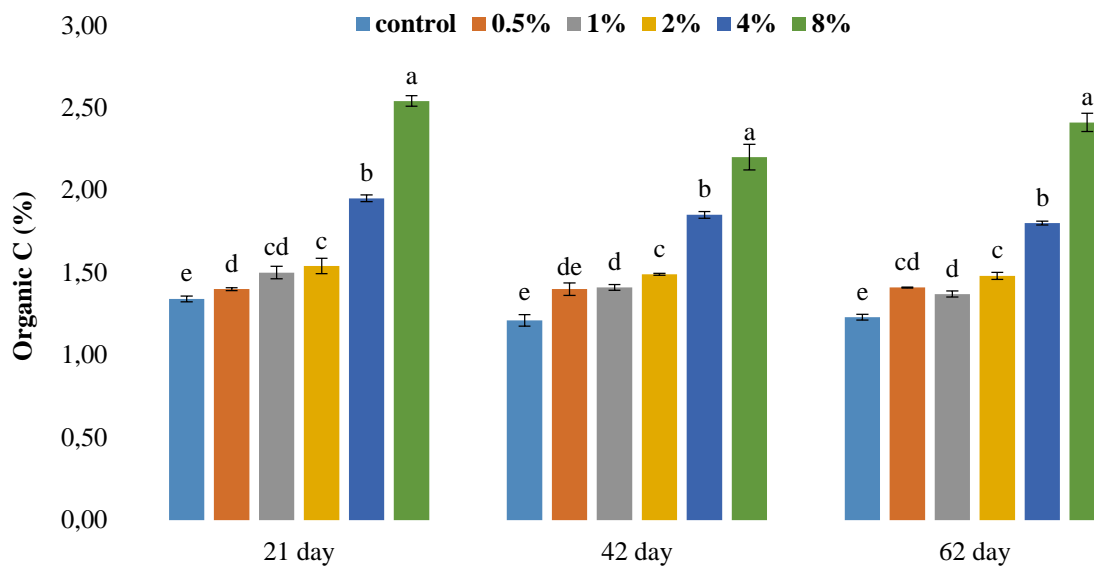

229  
 230 **Fig 5.** Effects of different rates of SMC applications on soil organic carbon, Error bars indicate least significant  
 231 difference ( $P < 0.05$ ). For additional information regarding results of one way ANOVA LSD test. 0.5, 1, 2, 4 and  
 232 8% SMC

### 233 4.5 Total nitrogen (N)

234 The effects of SMC on total nitrogen values of the soil are shown in Fig. 6. The total nitrogen  
 235 values significantly increased with respect to elevated SMC application. According to the  
 236 investigations at 21, 42, and 62 days, one could note 0.5, 1, and 2% applications, which  
 237 resulted in significant increase, and the strongest effect obtained with the doses of 4% and  
 238 8%. The nitrogen content of the soil was closely dependent on the amendment rates of the  
 239 SMC. In general, the total nitrogen content of soil increased with increasing amendment rates  
 240 of SMC. Nitrogen content of the soil showed a significant increase, depending on the rate of



241 SMC amendments and suggesting that the incubation period was sufficient for nitrogen  
 242 mobilization of the materials applied. With regards to the nitrogen dynamics in the soil, the  
 243 addition of the SMC produced, in general, an increase in the organic N concentration  
 244 throughout the experiment, especially in comparison to the control soil (Medina et al., 2012).  
 245 It is believed that physical, chemical and biological properties of SMC (especially C/N  
 246 mineralization level and decomposition) may play roles in the mineralization of nitrogen from  
 247 organic materials during the incubation periods.

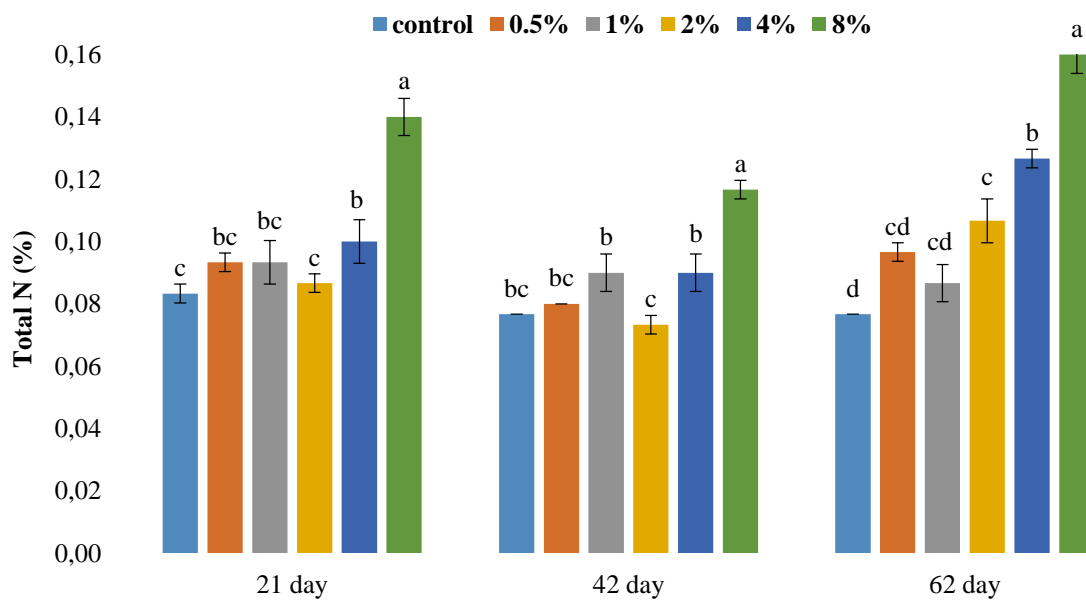

248 **Fig 6.** Effects of different rates of SMC applications on total nitrogen, Error bars indicate least significant  
 249 difference ( $P < 0.05$ ). For additional information regarding results of one way ANOVA LSD test. 0.5, 1, 2, 4 and  
 250 8% SMC  
 251

## 252 5 Conclusions

253 This study shows that the application spent mushroom compost can improve the stability of  
 254 the structure of soils. Physical and chemical properties of the soil, such as aggregate stability,  
 255 soil modulus of rupture, organic carbon, and total nitrogen were improved by SMC  
 256 amendment. SMC increased soil EC, with all treatments having EC values well below the  
 257 upper limit of  $4000 \mu\text{S cm}^{-1}$ , as suggested for agricultural soils (Arthur et al., 2012; Postel and  
 258 Starke, 1990; Rhoades et al., 1992). Soil aggregate stability and modulus of rupture were the  
 259 most dramatically affected by SMC application. The use of spent mushroom compost may  
 260 contribute to enhancing the level of organic carbon and nitrogen in the soil. In addition, the  
 261 results show that the spent mushroom compost application is an effective way to improve soil  
 262 physicochemical properties. This structural improvement has direct benefits for both the  
 263 farmers of degraded soils as well as mushroom growers who require a safe disposal method  
 264 for waste products.

## 265 Acknowledgements

266 The authors would you like to thanks Dr. Ali Sabır of Department of Horticulture, Faculty of  
 267 Agriculture, University of Selçuk for her helpful comments and Hamza Negiş of Department

268 of Soil Science and Plant Nutrition, Faculty of Agriculture, University of Selçuk for helpful  
269 laboratory analysis.

## 270 **References**

271 Abiven, S., Menasseri, S., and Chenu, C.: The effects of organic inputs over time on soil  
272 aggregate stability—A literature analysis, *Soil Biology and Biochemistry*, 41, 1-12,  
273 doi:10.1016/j.soilbio.2008.09.015, 2009.

274 Aksakal, E. L., Sari, S., and Angin, I.: Effects of vermicompost application on soil  
275 aggregation and certain physical properties, *Land Degradation & Development*, doi:  
276 10.1002/ldr.2350, 2015.

277 Arthur, E., Cornelis, W., and Razzaghi, F.: Compost Amendment to sandy soil affects soil  
278 properties and greenhouse tomato productivity, *Compost Science & Utilization*, 20, 215-221,  
279 <http://dx.doi.org/10.1080/1065657X.2012.10737051>, 2012.

280 Arthur, E., Cornelis, W., Vermang, J., and De Rocker, E.: Amending a loamy sand with three  
281 compost types: impact on soil quality, *Soil Use and Management*, 27, 116-123, doi:  
282 10.1111/j.1475-2743.2010.00319.x, 2011.

283 Bal, L., Şeker, C., and Ersoy Gümüş, İ.: Kaymak Tabakası Oluşumuna Fiziko-Kimyasal  
284 Faktörlerin Etkileri, *SELÇUK TARIM VE GIDA BİLİMLERİ DERGİSİ*, 25, 96-103, 2012.

285 Boix-Fayos, C., Calvo-Cases, A., Imeson, A., and Soriano-Soto, M.: Influence of soil  
286 properties on the aggregation of some Mediterranean soils and the use of aggregate size and  
287 stability as land degradation indicators, *Catena*, 44, 47-67, doi:10.1016/S0341-  
288 8162(00)00176-4, 2001.

289 Bone, J., Barraclough, D., Eggleton, P., Head, M., Jones, D., and Voulvoulis, N.: Prioritising  
290 soil quality assessment through the screening of sites: the use of publicly collected data, *Land  
291 Degradation & Development*, 25, 251-266, doi: 10.1002/ldr.2138, 2014.

292 Bronick, C. J. and Lal, R.: Soil structure and management: a review, *Geoderma*, 124, 3-22,  
293 2005.

294 Candemir, F. and Gülser, C.: Effects of different agricultural wastes on some soil quality  
295 indexes in clay and loamy sand fields, *Communications in soil science and plant analysis*, 42,  
296 13-28, doi: 10.1080/00103624.2011.528489, 2010.

297 Caravaca, F., Masciandaro, G., and Ceccanti, B.: Land use in relation to soil chemical and  
298 biochemical properties in a semiarid Mediterranean environment, *Soil and Tillage Research*,  
299 68, 23-30, 2002.

300 Carrizo, M. E., Alesso, C. A., Cosentino, D., and Imhoff, S.: Aggregation agents and  
301 structural stability in soils with different texture and organic carbon contents, *Scientia  
302 Agricola*, 72, 75-82, <http://dx.doi.org/10.1590/0103-9016-2014-0026>, 2015.

303 Cassel, D. and Nielsen, D.: Field capacity and available water capacity, *Methods of Soil  
304 Analysis: Part 1—Physical and Mineralogical Methods*, 1986. 901-926, 1986.

305 Cerdà, A.: Soil aggregate stability under different Mediterranean vegetation types, *Catena*, 32,  
306 73-86, doi:10.1016/S0341-8162(98)00041-1, 1998.

307 Chan, K., Heenan, D., and So, H.: Sequestration of carbon and changes in soil quality under  
308 conservation tillage on light-textured soils in Australia: a review, *Animal Production Science*,  
309 43, 325-334, doi:10.1071/EA02077, 2003.

310 Cooperation, L.: Truspec carbon/nitrogen determinator, Leco Cooperation, 3000, 2003.

311 Courtney, R. and Mullen, G.: Soil quality and barley growth as influenced by the land  
312 application of two compost types, *Bioresource Technology*, 99, 2913-2918,  
313 doi:10.1016/j.biortech.2007.06.034, 2008.

314 Curtin, J. and Mullen, G.: Physical properties of some intensively cultivated soils of Ireland  
315 amended with spent mushroom compost, *Land Degradation & Development*, 18, 355-368,  
316 doi: 10.1002/ldr.763, 2007.

317 Doran, J., Safley, M., Pankhurst, C., Doube, B., and Gupta, V.: Defining and assessing soil  
318 health and sustainable productivity, *Biological indicators of soil health.*, 1997. 1-28, 1997.

319 Erler, F. and Polat, E.: Mushroom cultivation in Turkey as related to pest and pathogen  
320 management, *Israel Journal of Plant Sciences*, 56, 303-308, doi: 10.1560/IJPS.56.4.303, 2008.

321 Ferreras, L., Gómez, E., Toresani, S., Firpo, I., and Rotondo, R.: Effect of organic  
322 amendments on some physical, chemical and biological properties in a horticultural soil,  
323 *Bioresource Technology*, 97, 635-640, doi:10.1016/j.biortech.2005.03.018, 2006.

324 Gee, G. W., Bauder, J. W., and Klute, A.: Particle-size analysis, *Methods of soil analysis. Part*  
325 *1. Physical and mineralogical methods*, 1986. 383-411, 1986.

326 Gelaw, A. M., Singh, B., and Lal, R.: Organic carbon and nitrogen associated with soil  
327 aggregates and particle sizes under different land uses in Tigray, Northern Ethiopia, *Land*  
328 *Degradation & Development*, 26, 690-700, doi: 10.1002/ldr.2261, 2015.

329 Grandy, A. S., Porter, G. A., and Erich, M. S.: Organic amendment and rotation crop effects  
330 on the recovery of soil organic matter and aggregation in potato cropping systems, *Soil*  
331 *Science Society of America Journal*, 66, 1311-1319, doi:10.2136/sssaj2002.1311, 2002.

332 Gulser, C., Demir, Z., and Ic, S.: Changes in some soil properties at different incubation  
333 periods after tobacco waste application, 2010.

334 Gümüs, I. and Şeker, C.: Influence of humic acid applications on modulus of rupture,  
335 aggregate stability, electrical conductivity, carbon and nitrogen content of a crusting problem  
336 soil, *Solid Earth*, 6, 1231-1236, doi:10.5194/se-6-1231-2015, 2015.

337 Hueso-González, P., Martínez-Murillo, J. F., and Ruiz-Sinoga, J. D.: The impact of organic  
338 amendments on forest soil properties under Mediterranean climatic conditions, *Land*  
339 *Degradation & Development*, 25, 604-612, doi: 10.1002/ldr.2296, 2014.

340 Jaiarree, S., Chidthaisong, A., Tangtham, N., Polprasert, C., Sarobol, E., and Tyler, S.:  
341 Carbon budget and sequestration potential in a sandy soil treated with compost, *Land*  
342 *Degradation & Development*, 25, 120-129, doi: 10.1002/ldr.1152, 2014.

343 Karlen, D., Mausbach, M., Doran, J., Cline, R., Harris, R., and Schuman, G.: Soil quality: a  
344 concept, definition, and framework for evaluation (a guest editorial), *Soil Science Society of*  
345 *America Journal*, 61, 4-10, 1997.

346 Kemper, W. and Rosenau, R.: Aggregate stability and size distribution. In *Methods of Soil*  
347 *analyses. Part 1'. 2nd Edn.(Ed. A. Klute.) Agron. Monogr. No. 9, Am. Soc. Agron.: Madison,*  
348 *Wis, 1986. 1986.*

349 Larney, F. J. and Angers, D. A.: The role of organic amendments in soil reclamation: a  
350 review, *Canadian Journal of Soil Science*, 92, 19-38, 2012.

351 Lashermes, G., Nicolardot, B., Parnaudeau, V., Thuries, L., Chaussod, R., Guillotin, M.,  
352 Lineres, M., Mary, B., Metzger, L., and Morvan, T.: Indicator of potential residual carbon in

353 soils after exogenous organic matter application, *European Journal of Soil Science*, 60, 297-  
354 310, doi: 10.1111/j.1365-2389.2008.01110.x, 2009.

355 Mahmoud, E. and Abd El-Kader, N.: Heavy metal immobilization in contaminated soils using  
356 phosphogypsum and rice straw compost, *Land Degradation & Development*, 26, 819-824,  
357 doi: 10.1002/ldr.2288, 2015.

358 Medina, E., Paredes, C., Bustamante, M., Moral, R., and Moreno-Caselles, J.: Relationships  
359 between soil physico-chemical, chemical and biological properties in a soil amended with  
360 spent mushroom substrate, *Geoderma*, 173, 152-161, doi:10.1016/j.geoderma.2011.12.011,  
361 2012.

362 MGM: Meteoroloji Genel Müdürlüğü Resmi İstatistikler (İllerimize Ait İstatistiki Veriler).  
363 2015.

364 Minitab, C.: Minitab reference manual (Release 7.1), State Coll., PA16801, USA, 1991. 1991.

365 Moreno, M. T., Carmona, E., Santiago, A., Ordovás, J., and Delgado, A.: Olive husk compost  
366 improves the quality of intensively cultivated agricultural soils, *Land Degradation &  
367 Development*, 27, 449-459, doi: 10.1002/ldr.2410, 2016.

368 Mukherjee, A., Zimmerman, A., Hamdan, R., and Cooper, W.: Physicochemical changes in  
369 pyrogenic organic matter (biochar) after 15 months of field aging, *Solid Earth*, 5, 693,  
370 doi:10.5194/se-5-693-2014, 2014.

371 Murphy, C.: Spent mushroom compost as an amendment on tillage land, M.Sc., University of  
372 Limerick: Ireland 2001.

373 Novara, A., Keesstra, S., Cerdà, A., Pereira, P., and Gristina, L.: Understanding the role of  
374 soil erosion on CO<sub>2</sub>-C loss using 13 C isotopic signatures in abandoned Mediterranean  
375 agricultural land, *Science of the Total Environment*, 550, 330-336,  
376 doi:10.1016/j.scitotenv.2016.01.095, 2016.

377 Novara, A., Rühl, J., La Mantia, T., Gristina, L., La Bella, S., and Tuttolomondo, T.: Litter  
378 contribution to soil organic carbon in the processes of agriculture abandon, *Solid Earth*, 6,  
379 425, doi:10.5194/se-6-425-2015, 2015.

380 Oo, A., Iwai, C., and Saenjan, P.: Soil properties and maize growth in saline and nonsaline  
381 soils using cassava-industrial waste compost and vermicompost with or without earthworms,  
382 *Land degradation & development*, 26, 300-310, doi: 10.1002/ldr.2208, 2015.

383 Parras-Alcántara, L., Lozano-García, B., and Galán-Espejo, A.: Soil organic carbon along an  
384 altitudinal gradient in the Despeñaperros Natural Park, southern Spain, *Solid Earth*, 6, 125,  
385 doi:10.5194/se-6-125-2015, 2015.

386 Paz-Ferreiro, J. and Fu, S.: Biological indices for soil quality evaluation: perspectives and  
387 limitations, *Land Degradation & Development*, doi: 10.1002/ldr.2262, 2013.

388 Peng, F., Quangang, Y., Xue, X., Guo, J., and Wang, T.: Effects of rodent-induced land  
389 degradation on ecosystem carbon fluxes in an alpine meadow in the Qinghai-Tibet Plateau,  
390 China, *Solid Earth*, 6, 303, doi:10.5194/se-6-303-2015, 2015.

391 Postel, S. and Starke, L.: Saving water for agriculture, *State of the World.*, 1990. 39-58, 1990.

392 Pulido Moncada, M., Gabriels, D., Cornelis, W., and Lobo, D.: Comparing aggregate stability  
393 tests for soil physical quality indicators, *Land Degradation & Development*, 26, 843-852, doi:  
394 10.1002/ldr.2225, 2015.

395 Reeve, R.: Modulus of rupture, *Methods of Soil Analysis. Part 1. Physical and Mineralogical  
396 Properties, Including Statistics of Measurement and Sampling*, 1965. 466-471, 1965.

397 Rhoades, J., Sparks, D., Page, A., Helmke, P., Loeppert, R., Soltanpour, P., Tabatabai, M.,  
398 Johnston, C., and Sumner, M.: Salinity: Electrical conductivity and total dissolved solids,  
399 Methods of soil analysis. Part 3-chemical methods., 1996. 417-435, 1996.  
400 Rhoades, J. D., Kandiah, A., and Mashali, A. M.: The use of saline waters for crop  
401 production, FAO Rome, 1992.  
402 Richards, L.: Modulus of rupture as an index of crusting of soil, Soil Science Society of  
403 America Journal, 17, 321-323, 1953.  
404 Roy, S. and Kashem, M. A.: Effects of Organic Manures in Changes of Some Soil Properties  
405 at Different Incubation Periods, Open Journal of Soil Science, doi:10.4236/ojss.2014.43011,  
406 2014.  
407 Seker, C.: Effects of selected amendments on soil properties and emergence of wheat  
408 seedlings, Canadian journal of soil science, 83, 615-621, doi: 10.4141/S02-080, 2003.  
409 Shiralipour, A., McConnell, D. B., and Smith, W. H.: Physical and chemical properties of  
410 soils as affected by municipal solid waste compost application, Biomass and Bioenergy, 3,  
411 261-266, doi:10.1016/0961-9534(92)90030-T, 1992.  
412 Staff, S. S.: Keys to soil taxonomy, Department of Agriculture: Natural Resources  
413 Conservation Service, 2006.  
414 Şeker, C. and Karakaplan, S.: Konya ovasında toprak özellikleri ile kırılma değerleri  
415 arasındaki ilişkiler, Tr. J. of Agriculture and Forestry, 29, 183-190, 1999.  
416 Thomas, G.: Soil pH and soil acidity. In 'Methods of soil analysis. Part 3. Chemical  
417 methods'.(Ed. DL Sparks) pp. 475-490, Soil Science Society of America: Madison, WI,  
418 1996. 1996.  
419 TÜİK, T. İ. Ö.: Statistics on plant products 2009-2015., 2015.  
420 Wu, Y., Xu, G., and Shao, H.: Furfural and its biochar improve the general properties of a  
421 saline soil, Solid Earth, 5, 665, doi:10.5194/se-5-665-2014, 2014.  
422 Yazdanpanah, N., Mahmoodabadi, M., and Cerdà, A.: The impact of organic amendments on  
423 soil hydrology, structure and microbial respiration in semiarid lands, Geoderma, 266, 58-65,  
424 doi:10.1016/j.geoderma.2015.11.032, 2016.  
425 Yilmaz, E.: Changes of some soil properties by agricultural processing waste (soybean pulp)  
426 amendment, Journal of Food, Agriculture & Environment, 8, 1057-1060, 2010.  
427 Yu, Y. and Jia, Z.: Changes in soil organic carbon and nitrogen capacities of *Salix cheilophila*  
428 Schneid along a revegetation chronosequence in semi-arid degraded sandy land of the Gonghe  
429 Basin, Tibet Plateau, Solid Earth, 5, 1045, doi:10.5194/se-5-1045-2014, 2014.  
430
