# Supplementary material for: Effects of Spent Mushroom Compost on Physicochemical Properties of Degraded Soil
Source: Copernicus journal article supplement (doi:10.5194/se-2016-122), 2016-09-30
Supplement: Supplementary file [file se-2016-122-AC7-supplement.pdf]

# 1 **Effects of Spent Mushroom Compost Application Physicochemical Properties of** 2 **Degraded Soil**

3 İlknur Gümüş

4 Department of Soil Science and Plant Nutrition, Faculty of Agriculture, University of Selçuk,  
5 42031 Konya, Turkey

6 Tel: +903322232932 Fax: +903322410108

7 Correspondence to: İlknur Gümüş,\*ersoy@selcuk.edu.tr

8 Cevdet ŞEKER

9 Department of Soil Science and Plant Nutrition, Faculty of Agriculture, University of Selçuk,  
10 42031 Konya, Turkey

11 Tel: +903322232928 Fax: +903322410108

## 12 **Abstract**

13 Land and laboratory studies show that the application of organic amendments into the soil  
14 improves the physicochemical properties of it. Spent mushroom compost (SMC) is proposed  
15 as a suitable organic amendment for soil structure restoration. One by-product of this industry  
16 and a major environmental problem is spent mushroom compost. The study aims to study  
17 explore SMC application on the physicochemical properties of a weak-structured and  
18 degraded soil. The approach involved establish a  experiment with spent mushroom  
19 compost applications (control, 0.5%, 1%, 2%, 4% and 8%), soil samples were incubated at  
20 field capacity for 21, 42, and 62 days. Spent mushroom compost applications into the soil  
21 significantly increased the aggregate stability (AS) and decreased the modulus of rupture.  
22 SMC increased soil EC, with all treatments having EC values well below the upper limit of  
23 4000 $\mu$ S cm<sup>-1</sup>, as suggested for agricultural soils Application of SMC at the rate of 1%, 2%,  
24 4%, and 8% were significantly increased the total nitrogen (N) and soil organic carbon (SOC)  
25 contents of the degraded soil at all incubation periods ( $p < 0.05$ ). The results obtained from this  
26 study clearly indicated that the application of spent mushroom compost reduces the modulus  
27 of rupture and ameliorates the increase of total nitrogen and soil organic carbon content.

28 Keywords: Aggregate stability, modulus of rupture, soil aggregation, soil structure, spent mushroom compost

## 29 **1 Introduction**

30 Soil quality is defined as the capacity of the soil to function within natural or managed  
31 ecosystem and land use boundaries, sustain biological productivity, to promote the quality of  
32 air and water environments, and to maintain plant, animal and human health (Doran et al.,  
33 1997; Karlen et al., 1997). Physical and chemical attributes are the main indicators used to  
34 assess soil quality (Bone et al., 2014; Paz-Ferreiro and Fu, 2013; Pulido Moncada et al.,  
35 2015). Soil quality is threatened by intensive management of the available urbanization and  
36 agricultural land, and by the increase in human activities (Paz-Ferreiro and Fu, 2013). Soil

37 quality is another important aspect closely related to soil degradation. Soil degradation  
38 decreases land productivity (Yu and Jia, 2014). Degradation of land can be divided into three  
39 types: arid, semi-arid, and sub-humid dry areas from various factors, including climatic  
40 variations and human activities (Yu and Jia, 2014). Soil degradation problem is particularly  
41 serious in the Mediterranean areas, where the effects of anthropogenic activities add to the  
42 problems caused by prolonged periods of drought and intense and irregular rainfall (Hueso-  
43 González et al., 2014). Vegetation degradation, land use change, and soil are among the  
44 degradation factors that causes soil carbon and nitrogen losses (Moreno et al., 2016; Peng et  
45 al., 2015). The reduction in soil structure is considered as a form of soil degradation (Chan et  
46 al., 2003), and is always with regards to land use and soil crop management practices.

47 Physical and structural soil degradation occurs mostly due to the decrease in soil organic  
48 matter caused by excessive soil cultivation (Grandy et al., 2002). Şeker and Karakaplan  
49 (1999) reported that the loss of organic matter is generally associated with a decrease in soil  
50 porosity and wet aggregate stability, as well as the increase in soil strength indices. Soil water  
51 movement and retention, crusting, root penetration, crop yield, erosion, and nutrient recycling  
52 are influenced by soil structure (Bal et al., 2012; Bronick and Lal, 2005; Seker, 2003).  
53 Organic materials are important soil additives that help to improve soil physical, chemical,  
54 and biological properties. Organic materials can improve the fertility of soil and soil  
55 amelioration (Wu et al., 2014). Besides good yield, these organic materials have been  
56 beneficial for soil chemical and physical fertility and stability that are possible due to organic  
57 matter (Mukherjee et al., 2014). Sustaining the productivity of soils is important, particularly  
58 in semi-arid regions (such as Turkey) where there is low input of organic materials (Gümüş  
59 and Şeker, 2015).

60 Mushroom cultivation has recently become very popular in Turkey, and is a promising new  
61 industry, with many new businesses developing every year. The main production areas are  
62 located in the western Mediterranean (Antalya, Burdur, and Isparta), Marmara (Kocaeli,  
63 Istanbul, Bursa, Sakarya, Yalova, Tekirdag, Bilecik, Balikesir), Black Sea (Kastamonu, Bolu,  
64 Zonguldak, Samsun, Amasya, Tokat, Sinop, Ordu, Giresun, Trabzon and Artvin), and central  
65 Anatolia (Ankara and Kırşehir) regions, but small quantities are also produced in east  
66 (Erzurum) and west Anatolia (Muğla, Denizli, and Izmir) (Erkel, 1992, 2000, 2004; Günay  
67 and Pekşen, 2004; Anonymous, 2015). Mushroom cultivation has recently become very  
68 popular in the Turkey and is a promising new industry, with many new businesses developing  
69 every year. Mushroom production in Turkey is separated into two components: compost  
70 production and mushroom cultivation. Compost application to agricultural soil has been  
71 widely practiced as one of the approaches to improve crop productivity and soil fertility  
72 (Jaiarree et al., 2014). Total fresh mushroom production of Turkey has increased 33-fold in  
73 the last 24 years, from about 19.501 tons in 2009 to about 39.495 tons in 2015, and the district  
74 of Antalya-Korkuteli alone produces more than 50% of the total compost production and  
75 approximately 45% of the fresh mushrooms sold in the whole country (Anonymous, 2015;  
76 Erler and Polat, 2008). If about five kilograms of fresh compost are needed to produce one  
77 kilogram of mushrooms, then about 15 tons of spent mushroom compost are produced each  
78 year (Uzun, 2004). Spent mushroom compost can be used in organic farming to improve soil

79 water infiltration, water holding capacity, permeability, and aeration. Composts provide a  
 80 stabilized form of organic matter that improves the physical properties of soils by increasing  
 81 both nutrient and water holding capacity, total pore space, aggregate stability, erosion  
 82 resistance, temperature insulation, and the decreasing apparent soil density (Shiralipour et al.,  
 83 1992).

84 The objective of this study is to indicate the effects of SPM application to degraded soil with  
 85 specific emphasis on aggregate stability, the modulus of rupture, electrical conductivity (EC),  
 86 nitrogen, and organic carbon.

## 87 2 Materials and Methods

88 Soil was collected from a problematic plot in the Agricultural Faculty of Selçuk University  
 89 experiment station (0-20 cm soil depth) near the Konya Sarıcalar-Village located in central  
 90 Anatolia, Turkey ( latitude of 38° 05' 56" N, longitude of 32° 36' 29" E, 1009 m above mean  
 91 sea level). The climate is semi-arid, with an annual precipitation of 379.38 mm, an annual  
 92 mean temperature of 11.5 °C, and an annual mean evaporation of 1226.4 mm (MGM, 2015).  
 93 Soil moisture and temperature regimes are xeric and mesic, respectively, according to the  
 94 climate data (Staff, 2006). Soil was classified as Fulivent (Staff, 2006). The soil sample used  
 95 in this study has certain problems, such as insufficient seedling emergency, low aggregate  
 96 stability, crusting problem, and low organic matter content (Bal et al., 2012). The area has a  
 97 typically rain-fed attribute with cultivation practices and various crops such as grains, sugar  
 98 beet, and corn with fruit trees of various ages. A portion of the land is located in the fruits  
 99 trees of different ages and types. The spent mushroom compost (SMC) used in the present  
 100 study were obtained from private companies dealing with mass mushroom production located  
 101 in Konya, Turkey.

102 **Table 1.** Some properties of the soil

| Soil properties                                  | Values | Soil properties                    | Values |
|--------------------------------------------------|--------|------------------------------------|--------|
| Sand (2-0.05 mm) (%)                             | 7      | Field capacity (%)                 | 35.6   |
| Silt (0.05-0.002 mm) (%)                         | 34     | Wilting point (%)                  | 16.19  |
| Clay (<0.002 mm) (%)                             | 59     | Aggregate stability (%)            | 10.83  |
| Textural class                                   | C      | Bulk density (g cm <sup>-3</sup> ) | 1.09   |
| pH (H <sub>2</sub> O, 1:2.5)                     | 7.96   |                                    |        |
| EC (H <sub>2</sub> O, 1:2.5) μS cm <sup>-1</sup> | 479    |                                    |        |
| C (%)                                            | 1.35   |                                    |        |
| Total N (%)                                      | 0.09   |                                    |        |
| Carbonates (%)                                   | 11.58  |                                    |        |

103

104 **Table 2.** Properties of the Spent Mushroom Compost (SMC)

| Properties                                     | SMC   |
|------------------------------------------------|-------|
| pH (H <sub>2</sub> O, 1:5)                     | 7.36  |
| EC (H <sub>2</sub> O, 1:5) μS cm <sup>-1</sup> | 5390  |
| C (%)                                          | 38.80 |
| N (%)                                          | 2.61  |
| C/N                                            | 14.88 |
| Organic matter (%)                             | 66.89 |

105

106 The experiment was carried out in a completely randomized plot design with three  
107 replications and conducted under laboratory conditions as a pot experiment. Surface soil  
108 samples (0-20 cm) were air-dried, ground, passed through a 2 mm sieve and mixed  
109 homogeneously. Firstly, soil samples (2000 g) were placed in each pot (dimensions of pot;  
110 13.5 cm x 17 cm). Six level of SMC, (0% (as control), 0.5%, 1%, 2%, 4%, and 8% by weight)  
111 were incubated. During the incubation period, the soil moisture level in the pots was  
112 maintained at 50-75% of field capacity. After various incubation periods (21, 42 and 62 days),  
113 the soil samples in each pot were mixed to ensure homogeneity in soil sub-sample. The soils  
114 were then sub-sampled (250 g) for analyses. Twenty first, 42<sup>nd</sup> and 62<sup>nd</sup> days of incubation  
115 periods, the samples were analyzed with three replications.

116 Particle-size distribution was determined by the hydrometer method (Gee et al., 1986). The  
117 moisture contents at field capacity and wilting point were determined with a pressure plate  
118 apparatus (Cassel and Nielsen, 1986) at -33 and -1500 kPa, respectively. Soil pH and EC  
119 values were determined by using a glass-calomel electrode in a 1:2.5 mixture (w/v) of soil and  
120 water; SMC pH and EC, samples were mixed with water 1:5 (Rhoades et al., 1996; Thomas,  
121 1996). Soil organic carbon was determined on sample ground to pass through a 0.5 mm sieve  
122 by the use of TruSpec CN Carbon/Nitrogen Determinator (Cooperation, 2003). The modulus  
123 of rupture was determined at 0.5 kPa sensitivity by the procedure of Richards (1953) using  
124 briquettes prepared in moulds made from mild steel of rectangular cross-section, and with  
125 interior dimensions of  $7 \times 3.5 \times 1$  cm. The briquettes were prepared by using sieved subsoil  
126 samples (< 2 mm), taken from each pot, which were then placed in a soaking tank of distilled  
127 water filled to the upper surface of the mould. They were allowed to stand for 1 h, and then  
128 dried at 50°C. The briquettes were broken by a downward motion of a bar of triangular cross  
129 section, the force being applied by water additions to a vessel. The modulus of rupture was  
130 calculated as follows:

131 Where MR is the modulus of rupture (kPa),  $f$  is the breaking force in grams of water  $\times 980$ ,  $L$   
132 is the distance between the lower supports in cm,  $b$  is the width of the briquette in cm, and  $d$  is  
133 the thickness of the briquette in cm (Reeve, 1965; Richards, 1953). Aggregate stability was  
134 determined by immersing the sieves containing the aggregate samples (between 1-2mm size)  
135 in distilled water at up and down oscillating on screens through 55 mm at 30 strokes min<sup>-1</sup> for  
136 5 min (Kemper and Rosenau, 1986).

### 137 **3 Statistical analyses**

138 The data collected were subjected one-way analysis of variance (ANOVA) test and treatment  
139 means were compared at  $p < 0.05$  using the F-LSD significant difference test (Minitab, 1991).

### 140 **4 Results and Discussion**

#### 141 **Aggregate stability (AS)**

142 Effects of SMC application on aggregate stability are given in Fig. 1. Aggregate stability  
143 values of the soil treated with different doses SMC application was measured after 21, 42, and

144 62 days incubation periods, respectively. The effects of SMC application on soil aggregate  
 145 stability values were significant by statistically. Generally, aggregate stability increased with  
 146 SMC applications. These results may be explained by aggregate stability and soil organic  
 147 matter that are two parameters and indicators for sustaining soil productivity. Aggregate  
 148 stability is a key factor of soil fertility (Abiven et al., 2009). The recovery in aggregate  
 149 stability of such physically degraded soils is important, as those studied was expected to  
 150 follow the incorporation of any cementing agent, such as SMC (Curtin and Mullen, 2007).  
 151 Aggregate stability decreased at 42 and 62 days of incubation periods in all SMC rates, when  
 152 compared to a 21-day incubation period. These results may be explained by the  
 153 decomposition of soil organic matter (Carrizo et al., 2015; Seker, 2003). Aggregate size  
 154 distribution and stability can be used as an indicator of soil condition or degradation (Boix-  
 155 Fayos et al., 2001). Soil organic matter seems to be the most important factor, in order to  
 156 determine stabilizing soil aggregates (Aksakal et al., 2015; Candemir and Gülser, 2010;  
 157 Cerdà, 1998). Organic matter shows a direct relationship with aggregate stability (Cerdà,  
 158 1998). In addition, after the incubation period, as a result of mechanical mixing practices, the  
 159 aggregate stability of the soil samples decreased (Seker, 2003). Similarly, it is reported that  
 160 there is an increase in the soils organic carbon concentration after organic matter application,  
 161 and thus, a higher formation of stable aggregates (Arthur et al., 2011; Ferreras et al., 2006;  
 162 Gümüs and Şeker, 2015; Murphy, 2001).

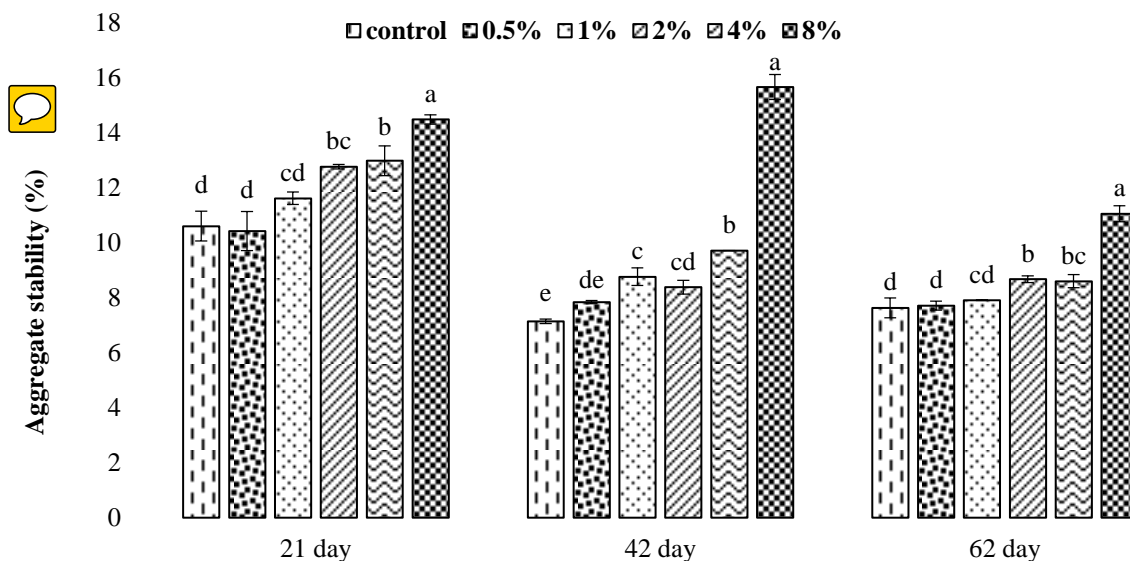

163 **Fig 1.** Effects of different rates of SMC applications on aggregate stability, Error bars indicate least significant  
 164 difference ( $P < 0.05$ ). For additional information regarding results of one way ANOVA LSD test. 0.5, 1, 2, 4 and  
 165 8% SMC  
 166

#### 167 4.2 Soil modulus of rupture

168 Effects of SMC application on soil modulus of rupture are shown in Fig. 2. All the SMC  
 169 applications resulted in significantly lower modulus of rupture at 21<sup>st</sup> and 42<sup>nd</sup> days, except  
 170 for the 62<sup>nd</sup> day incubation. In general, soil modulus of rupture decreased with the increasing  
 171 application rates of SMC. The effects were especially due to the high organic matter contents

172 of SMC that improved soil structure mechanically (Gümüş and Şeker, 2015; Seker, 2003).  
 173 The SMC used in the study contains significant amounts of organic substances. Reason for its  
 174 modulus of rupture can be related to the inhibitory effects of SMC on the tight unity  
 175 formation of soil particles. The structural stabilization is related to organic matter inputs  
 176 (Caravaca et al., 2002; Ferreras et al., 2006), and thus, a significant decrease in the modulus  
 177 of rupture was attained with the application rate of SMC. These results may be explained  
 178 through the formation of aggregates during the incubation periods. The modulus of rupture  
 179 was reduced because of the increase in soil organic matter, which allowed less cohesion  
 180 among the soil particles (Seker, 2003). Organic amendments are known to decrease particle  
 181 and bulk density in soil (Moreno et al., 2016). The absence of such effects in 62 days can be  
 182 related to the decrease in aggregate stability and organic substances. This, most probably,  
 183 resulted from the breakdown of soil decomposition and the aggregates of soil organic matter  
 184 by mixing pot contents to simulate repeated cultivation (Carrizo et al., 2015; Seker, 2003).

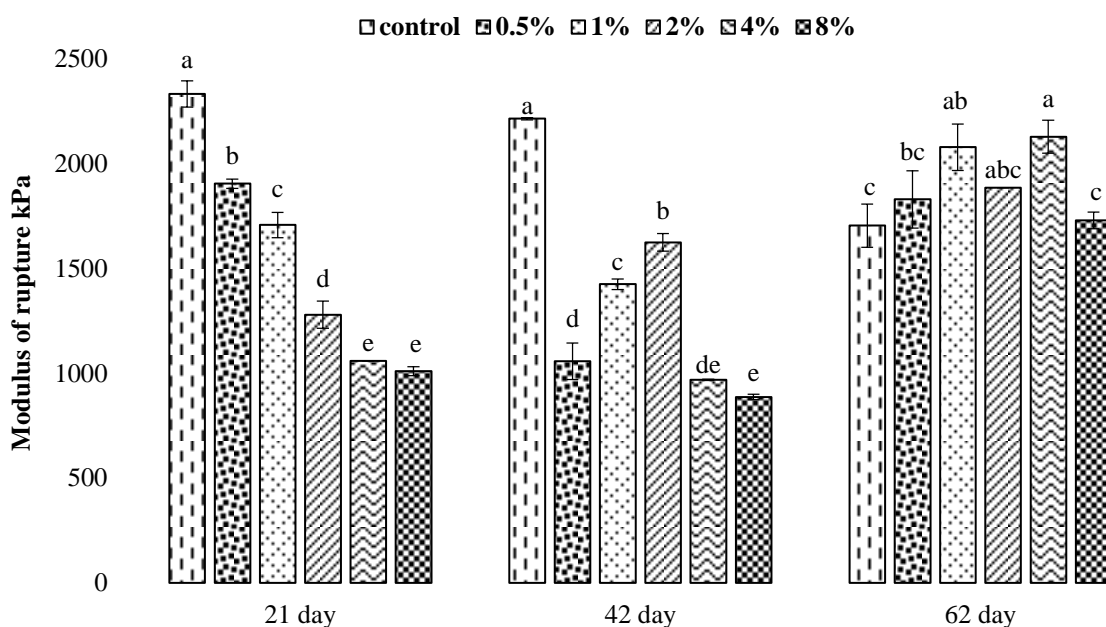

185  
 186 **Fig 2.** Effects of different rates of SMC applications on soil modulus of rupture, Error bars indicate least  
 187 significant difference ( $P < 0.05$ ). For additional information regarding results of one way ANOVA LSD test. 0.5,  
 188 1, 2, 4 and 8% SMC

189  **EC**

190 The effects of SMC on EC values of the soil are given in Fig. 3. The EC values significantly  
 191 increased with respect to elevated SMC application. According to investigation soil, EC  
 192 gradually increased with incubation periods significantly, and the magnitude of such increase  
 193 was higher in the SMC-amended soil than the control soil. The increasing EC values in an  
 194 experiment for different doses of SMC application may be explained by the high content of  
 195 solutes nutrient composition of organic fragments, and the remains from the materials during  
 196 incubation periods (Yilmaz, 2010). EC can serve as a measure for the presence of nutrients for  
 197 both cations and anions (Roy and Kashem, 2014). Soil EC indicates the mineralization of

198 organic matter in soil and many authors have found positive correlations between EC and  
 199 compounds from organic matter degradation in soil (Arthur et al., 2012; Gulser et al., 2010;  
 200 Medina et al., 2012). However, EC values were still below the upper limit of 4000  $\mu\text{S cm}^{-1}$   
 201 <sup>1</sup>suggested for agricultural soils, even at 8% application rates (Arthur et al., 2012; Postel and  
 202 Starke, 1990; Rhoades et al., 1992).

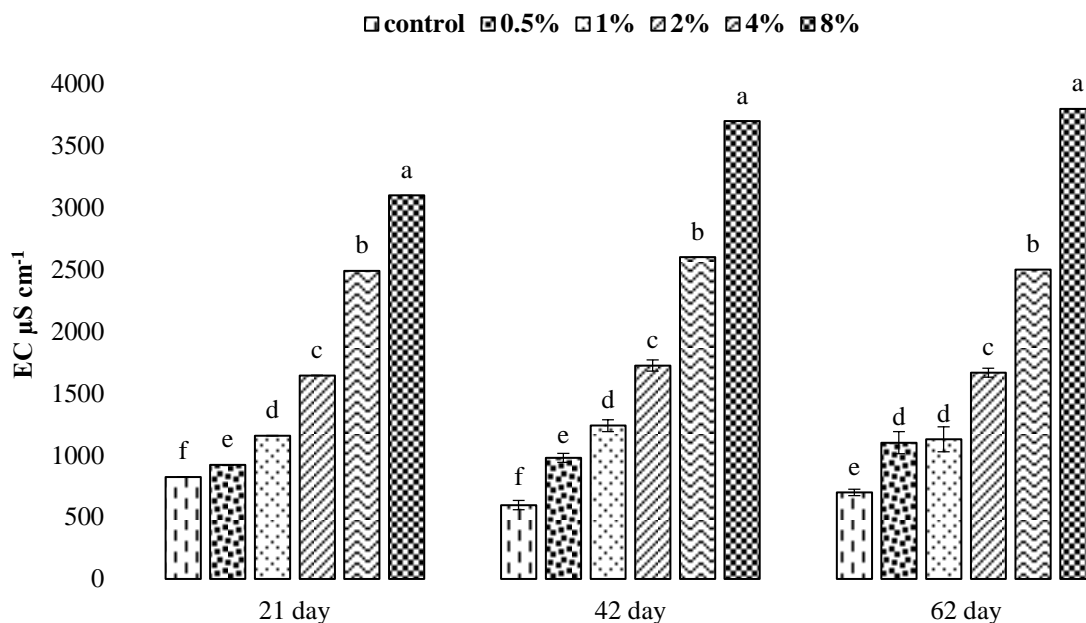

203  
 204 **Fig 3.** Effects of different rates of SMC applications on soil EC, Error bars indicate least significant difference  
 205 ( $P < 0.05$ ). For additional information regarding results of one way ANOVA LSD test. 0.5, 1, 2, 4 and 8% SMC

#### 206 4.4 Soil organic carbon (SOC)

207 The effects of SMC on SOC values of the soil are shown in Fig. 4. The SOC values  
 208 significantly increased with regard to elevated SMC application. Investigation performed at  
 209 incubation periods revealed that soil SOC existentially increased in response to the increment  
 210 in SMC dose, and the strongest effect were obtained with the doses 4% and 8%, where  
 211 differences in SOC values, depending on incubation periods and rates of SMC was noticed.  
 212 SOC content of soil increased with the increasing amendment rates of SMC. In general, SOC  
 213 content values in experiments increase with the increase of amendment rates of organic  
 214 materials. Soil organic carbon is known to play important roles in the maintenance, as well as  
 215 improvement of many soil properties, and thus, its concentration is often cited as one of the  
 216 major indicators for sustaining soil productivity. Increases in soil organic carbon contents can  
 217 be achieved by adding spent mushroom compost application (Courtney and Mullen, 2008;  
 218 Medina et al., 2012).

219 Organic amendments used in soil reclamation emanate from a variety of sources, including  
 220 agriculture, forestry, and urban areas. Of those generated by agriculture, livestock manure  
 221 from various species is the most prevalent. Other amendments derived from agriculture  
 222 include crop residues and spent mushroom compost. The rate of decomposition of organic  
 223 amendments and soil organic carbon remains over a long-term vary with the intrinsic quality



224 of the amendment (Lashermes et al., 2009; Novara et al., 2015). Carbon in organic  
 225 amendments was originally fixed by plants through photosynthesis (Larney and Angers,  
 226 2012). Soil organic carbon increases due to high organic carbon (Oo et al., 2015), soil  
 227 biological activity, and/or the root depth effect (Parras-Alcántara et al., 2015). Soil organic  
 228 matter content is one of the most important soil quality indicators of soil recovery (Mahmoud  
 229 and Abd El-Kader, 2015; Parras-Alcántara et al., 2015; Pulido Moncada et al., 2015) and it is  
 230 a good sign for soil quality (Gelaw et al., 2015). The quality of soil organic matter, soil  
 231 structure, the microbial activity, and the rainfall intensity are, in fact, important parameters  
 232 that should be evaluated and correlated to assess the fate of carbon during transportation  
 233 (Novara et al., 2016). Similar results were reported by a few other studies (Arthur et al., 2011;  
 234 Curtin and Mullen, 2007; Yazdanpanah et al., 2016).

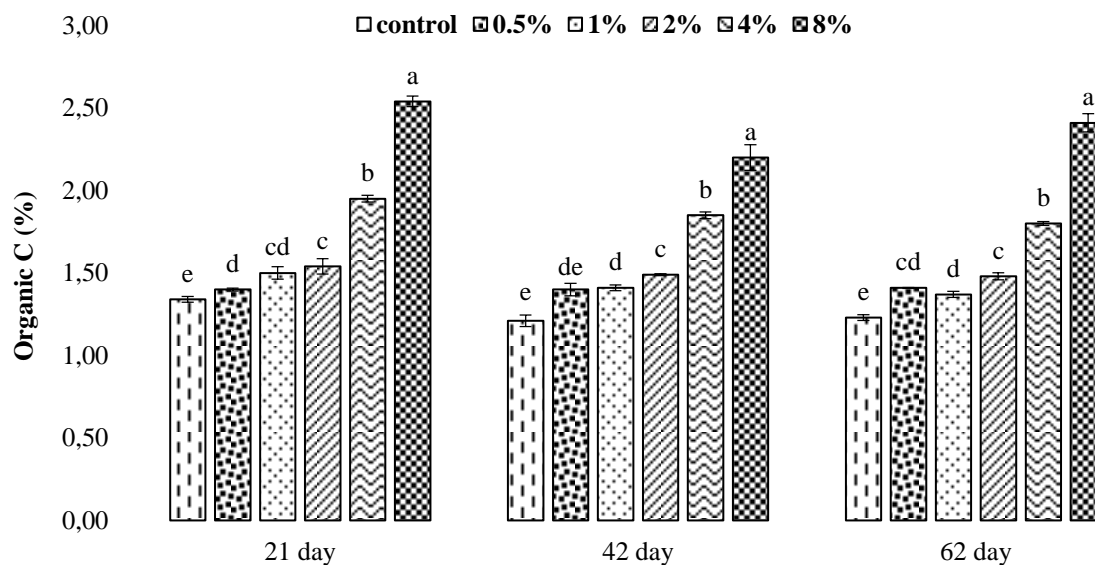

235 **Fig 4.** Effects of different rates of SMC applications on soil organic carbon, Error bars indicate least significant  
 236 difference ( $P < 0.05$ ). For additional information regarding results of one way ANOVA LSD test. 0.5, 1, 2, 4 and  
 237 8% SMC  
 238

239  **Total nitrogen (N)**

240 The effects of SMC on total nitrogen values of the soil are shown in Fig. 5. The total nitrogen  
 241 values significantly increased with respect to elevated SMC application. According to the  
 242 investigations at 21, 42, and 62 days, one could note 0.5, 1, and 2% applications, which  
 243 resulted in significant increase, and the strongest effect obtained with the doses of 4% and  
 244 8%. The nitrogen content of the soil was closely dependent on the amendment rates of the  
 245 SMC. In general, the total nitrogen content of soil increased with increasing amendment rates  
 246 of SMC. Nitrogen content of the soil showed a significant increase, depending on the rate of  
 247 SMC amendments and suggesting that the incubation period was sufficient for nitrogen  
 248 mobilization of the materials applied. With regards to the nitrogen dynamics in the soil, the  
 249 addition of the SMC produced, in general, an increase in the organic N concentration  
 250 throughout the experiment, especially in comparison to the control soil (Medina et al., 2012).  
 251 It is believed that physical, chemical and biological properties of SMC (especially C/N



252 mineralization level and decomposition) may play roles in the mineralization of nitrogen from  
 253 organic materials during the incubation periods.

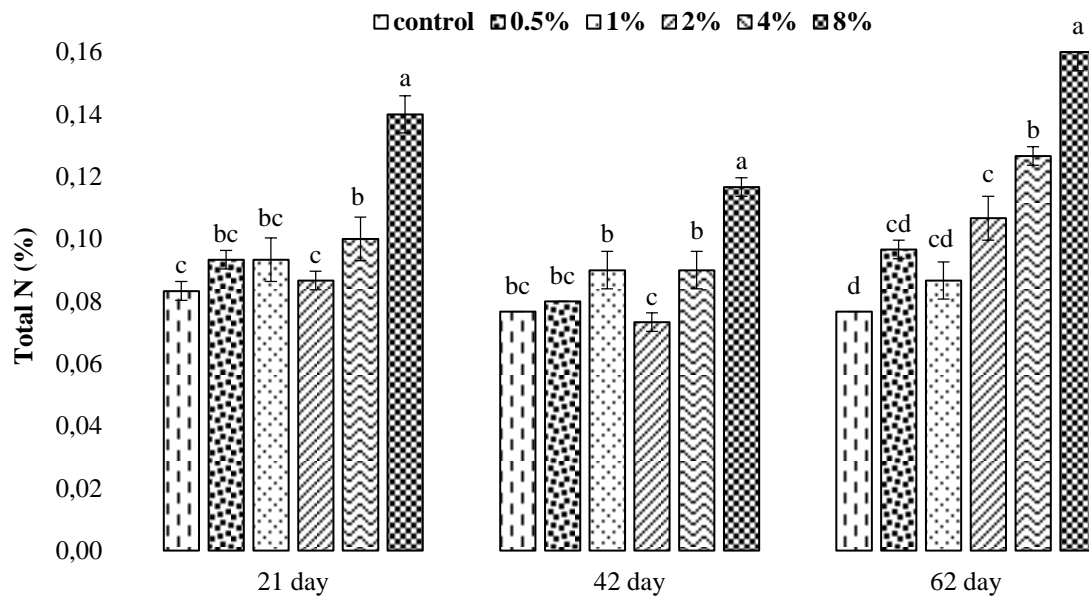

254 **Fig 5.** Effects of different rates of SMC applications on total nitrogen, Error bars indicate least significant  
 255 difference ( $P < 0.05$ ). For additional information regarding results of one way ANOVA LSD test. 0.5, 1, 2, 4 and  
 256 8% SMC  
 257

## 258 Conclusions

259 This study shows that the application spent mushroom compost can improve the stability of  
 260 the structure of soils. Physical and chemical properties of the soil, such as aggregate stability,  
 261 soil modulus of rupture, organic carbon, and total nitrogen were improved by SMC  
 262 amendment. SMC increased soil EC, with all treatments having EC values well below the  
 263 upper limit of  $4000 \mu\text{S cm}^{-1}$ , as suggested for agricultural soils (Arthur et al., 2012; Postel and  
 264 Starke, 1990; Rhoades et al., 1992). Soil aggregate stability and modulus of rupture were the  
 265 most dramatically affected by SMC application. The use of spent mushroom compost may  
 266 contribute to enhancing the level of organic carbon and nitrogen in the soil. In addition, the  
 267 results show that the spent mushroom compost application is an effective way to improve soil  
 268 physicochemical properties. This structural improvement has direct benefits for both the  
 269 farmers of degraded soils as well as mushroom growers who require a safe disposal method  
 270 for waste products.

## 271 Acknowledgements

272 The authors would you like to thanks Dr. Ali Sabır of Department of Horticulture, Faculty of  
 273 Agriculture, University of Selçuk for her helpful comments and Hamza Negiş of Department  
 274 of Soil Science and Plant Nutrition, Faculty of Agriculture, University of Selçuk for helpful  
 275 laboratory analysis.

276

277

278 **References**

- 279 Abiven, S., Menasseri, S., and Chenu, C.: The effects of organic inputs over time on soil  
280 aggregate stability—A literature analysis, *Soil Biology and Biochemistry*, 41, 1-12,  
281 doi:10.1016/j.soilbio.2008.09.015, 2009.
- 282 Aksakal, E. L., Sari, S., and Angin, I.: Effects of vermicompost application on soil  
283 aggregation and certain physical properties, *Land Degradation & Development*, doi:  
284 10.1002/ldr.2350, 2015.
- 285 Arthur, E., Cornelis, W., and Razzaghi, F.: Compost Amendment to sandy soil affects soil  
286 properties and greenhouse tomato productivity, *Compost Science & Utilization*, 20, 215-221,  
287 <http://dx.doi.org/10.1080/1065657X.2012.10737051>, 2012.
- 288 Arthur, E., Cornelis, W., Vermang, J., and De Rocker, E.: Amending a loamy sand with three  
289 compost types: impact on soil quality, *Soil Use and Management*, 27, 116-123, doi:  
290 10.1111/j.1475-2743.2010.00319.x, 2011.
- 291 Bal, L., Şeker, C., and Ersoy Gümüş, İ.: Kaymak Tabakası Oluşumuna Fiziko-Kimyasal  
292 Faktörlerin Etkileri, *SELÇUK TARIM VE GIDA BİLİMLERİ DERGİSİ*, 25, 96-103, 2012.
- 293 Boix-Fayos, C., Calvo-Cases, A., Imeson, A., and Soriano-Soto, M.: Influence of soil  
294 properties on the aggregation of some Mediterranean soils and the use of aggregate size and  
295 stability as land degradation indicators, *Catena*, 44, 47-67, doi:10.1016/S0341-  
296 8162(00)00176-4, 2001.
- 297 Bone, J., Barraclough, D., Eggleton, P., Head, M., Jones, D., and Voulvoulis, N.: Prioritising  
298 soil quality assessment through the screening of sites: the use of publicly collected data, *Land*  
299 *Degradation & Development*, 25, 251-266, doi: 10.1002/ldr.2138, 2014.
- 300 Bronick, C. J. and Lal, R.: Soil structure and management: a review, *Geoderma*, 124, 3-22,  
301 2005.
- 302 Candemir, F. and Gülser, C.: Effects of different agricultural wastes on some soil quality  
303 indexes in clay and loamy sand fields, *Communications in soil science and plant analysis*, 42,  
304 13-28, doi: 10.1080/00103624.2011.528489, 2010.
- 305 Caravaca, F., Masciandaro, G., and Ceccanti, B.: Land use in relation to soil chemical and  
306 biochemical properties in a semiarid Mediterranean environment, *Soil and Tillage Research*,  
307 68, 23-30, 2002.
- 308 Carrizo, M. E., Alesso, C. A., Cosentino, D., and Imhoff, S.: Aggregation agents and  
309 structural stability in soils with different texture and organic carbon contents, *Scientia*  
310 *Agricola*, 72, 75-82, <http://dx.doi.org/10.1590/0103-9016-2014-0026>, 2015.
- 311 Cassel, D. and Nielsen, D.: Field capacity and available water capacity, *Methods of Soil*  
312 *Analysis: Part 1—Physical and Mineralogical Methods*, 1986. 901-926, 1986.
- 313 Cerdà, A.: Soil aggregate stability under different Mediterranean vegetation types, *Catena*, 32,  
314 73-86, doi:10.1016/S0341-8162(98)00041-1, 1998.
- 315 Chan, K., Heenan, D., and So, H.: Sequestration of carbon and changes in soil quality under  
316 conservation tillage on light-textured soils in Australia: a review, *Animal Production Science*,  
317 43, 325-334, doi:10.1071/EA02077, 2003.
- 318 Cooperation, L.: Truspec carbon/nitrogen determinator, Leco Cooperation, 3000, 2003.

319 Courtney, R. and Mullen, G.: Soil quality and barley growth as influenced by the land  
320 application of two compost types, *Bioresource Technology*, 99, 2913-2918,  
321 doi:10.1016/j.biortech.2007.06.034, 2008.

322 Curtin, J. and Mullen, G.: Physical properties of some intensively cultivated soils of Ireland  
323 amended with spent mushroom compost, *Land Degradation & Development*, 18, 355-368,  
324 doi: 10.1002/ldr.763, 2007.

325 Doran, J., Safley, M., Pankhurst, C., Doube, B., and Gupta, V.: Defining and assessing soil  
326 health and sustainable productivity, *Biological indicators of soil health.*, 1997. 1-28, 1997.

327 Erkel, E.I.: The status of mushroom cultivation in the world and Turkey, The 4<sup>th</sup> Turkish  
328 Mushroom Congress 2–4 November 1992 Yalova, Turkey, **Vol. 1**, pp: 1–8, 1992.

329 Erkel, E.I.: *Mushroom growing*, 2<sup>nd</sup> ed. Kocaoluk Press, Istanbul, Turkey, 160 pp, 2000.

330 Erkel, E.I.: Determination of mushroom growing potential in Kocaeli province (Turkey) and  
331 its surroundings, *Proceedings of the 7<sup>th</sup> Turkish Mushroom Congress*, Hasad Publisher,  
332 Istanbul, Turkey, pp: 21–29, 2004.

333 Ferreras, L., Gómez, E., Toresani, S., Firpo, I., and Rotondo, R.: Effect of organic  
334 amendments on some physical, chemical and biological properties in a horticultural soil,  
335 *Bioresource Technology*, 97, 635-640, doi:10.1016/j.biortech.2005.03.018, 2006.

336 Gee, G. W., Bauder, J. W., and Klute, A.: Particle-size analysis, *Methods of soil analysis. Part*  
337 *1. Physical and mineralogical methods*, 1986. 383-411, 1986.

338 Gelaw, A. M., Singh, B., and Lal, R.: Organic carbon and nitrogen associated with soil  
339 aggregates and particle sizes under different land uses in Tigray, Northern Ethiopia, *Land*  
340 *Degradation & Development*, 26, 690-700, doi: 10.1002/ldr.2261, 2015.

341 Grandy, A. S., Porter, G. A., and Erich, M. S.: Organic amendment and rotation crop effects  
342 on the recovery of soil organic matter and aggregation in potato cropping systems, *Soil*  
343 *Science Society of America Journal*, 66, 1311-1319, doi:10.2136/sssaj2002.1311, 2002.

344 Gulser, C., Demir, Z., and Ic, S.: Changes in some soil properties at different incubation  
345 periods after tobacco waste application, 2010.

346 Gümüs, I. and Şeker, C.: Influence of humic acid applications on modulus of rupture,  
347 aggregate stability, electrical conductivity, carbon and nitrogen content of a crusting problem  
348 soil, *Solid Earth*, 6, 1231-1236, doi:10.5194/se-6-1231-2015, 2015.

349

350 Gunay, A, Peksen, A.: Studies on the mushroom cultivation in the Middle and East Black Sea  
351 regions, *Proceedings of the 7<sup>th</sup> Turkish Mushroom Congress*, Hasad Publisher, Istanbul,  
352 Turkey, pp: 30–37, 2004.

353 Hueso-González, P., Martínez-Murillo, J. F., and Ruiz-Sinoga, J. D.: The impact of organic  
354 amendments on forest soil properties under Mediterranean climatic conditions, *Land*  
355 *Degradation & Development*, 25, 604-612, doi: 10.1002/ldr.2296, 2014.

356 Jaiarree, S., Chidthaisong, A., Tangtham, N., Polprasert, C., Sarobol, E., and Tyler, S.:  
357 Carbon budget and sequestration potential in a sandy soil treated with compost, *Land*  
358 *Degradation & Development*, 25, 120-129, doi: 10.1002/ldr.1152, 2014.

359 Karlen, D., Mausbach, M., Doran, J., Cline, R., Harris, R., and Schuman, G.: Soil quality: a  
360 concept, definition, and framework for evaluation (a guest editorial), *Soil Science Society of*  
361 *America Journal*, 61, 4-10, 1997.

362 Kemper, W. and Rosenau, R.: Aggregate stability and size distribution. In *Methods of Soil*  
363 *analyses. Part 1'. 2nd Edn.(Ed. A. Klute.) Agron. Monogr. No. 9, Am. Soc. Agron.: Madison,*  
364 *Wis, 1986. 1986.*

365 Larney, F. J. and Angers, D. A.: The role of organic amendments in soil reclamation: a  
366 review, *Canadian Journal of Soil Science*, 92, 19-38, 2012.

367 Lashermes, G., Nicolardot, B., Parnaudeau, V., Thuries, L., Chaussod, R., Guillotin, M.,  
368 Lineres, M., Mary, B., Metzger, L., and Morvan, T.: Indicator of potential residual carbon in  
369 soils after exogenous organic matter application, *European Journal of Soil Science*, 60, 297-  
370 310, doi: 10.1111/j.1365-2389.2008.01110.x, 2009.

371 Mahmoud, E. and Abd El-Kader, N.: Heavy metal immobilization in contaminated soils using  
372 phosphogypsum and rice straw compost, *Land Degradation & Development*, 26, 819-824,  
373 doi: 10.1002/ldr.2288, 2015.

374 Medina, E., Paredes, C., Bustamante, M., Moral, R., and Moreno-Caselles, J.: Relationships  
375 between soil physico-chemical, chemical and biological properties in a soil amended with  
376 spent mushroom substrate, *Geoderma*, 173, 152-161, doi:10.1016/j.geoderma.2011.12.011,  
377 2012.

378 MGM: Meteoroloji Genel Müdürlüğü Resmi İstatistikler (İllerimize Ait İstatistiki Veriler).  
379 2015.

380 Minitab, C.: Minitab reference manual (Release 7.1), State Coll., PA16801, USA, 1991. 1991.

381 Moreno, M. T., Carmona, E., Santiago, A., Ordovás, J., and Delgado, A.: Olive husk compost  
382 improves the quality of intensively cultivated agricultural soils, *Land Degradation &*  
383 *Development*, 27, 449-459, doi: 10.1002/ldr.2410, 2016.

384 Mukherjee, A., Zimmerman, A., Hamdan, R., and Cooper, W.: Physicochemical changes in  
385 pyrogenic organic matter (biochar) after 15 months of field aging, *Solid Earth*, 5, 693,  
386 doi:10.5194/se-5-693-2014, 2014.

387 Murphy, C.: Spent mushroom compost as an amendment on tillage land, M.Sc., University of  
388 Limerick: Ireland 2001.

389 Novara, A., Keesstra, S., Cerdà, A., Pereira, P., and Gristina, L.: Understanding the role of  
390 soil erosion on CO<sub>2</sub>-C loss using <sup>13</sup>C isotopic signatures in abandoned Mediterranean  
391 agricultural land, *Science of the Total Environment*, 550, 330-336,  
392 doi:10.1016/j.scitotenv.2016.01.095, 2016.

393 Novara, A., Rühl, J., La Mantia, T., Gristina, L., La Bella, S., and Tuttolomondo, T.: Litter  
394 contribution to soil organic carbon in the processes of agriculture abandon, *Solid Earth*, 6,  
395 425, doi:10.5194/se-6-425-2015, 2015.

396 Oo, A., Iwai, C., and Saenjan, P.: Soil properties and maize growth in saline and nonsaline  
397 soils using cassava-industrial waste compost and vermicompost with or without earthworms,  
398 *Land degradation & development*, 26, 300-310, doi: 10.1002/ldr.2208, 2015.

399 Parras-Alcántara, L., Lozano-García, B., and Galán-Espejo, A.: Soil organic carbon along an  
400 altitudinal gradient in the Despeñaperros Natural Park, southern Spain, *Solid Earth*, 6, 125,  
401 doi:10.5194/se-6-125-2015, 2015.

402 Paz-Ferreiro, J. and Fu, S.: Biological indices for soil quality evaluation: perspectives and  
403 limitations, *Land Degradation & Development*, doi: 10.1002/ldr.2262, 2013.

404 Peng, F., Quangang, Y., Xue, X., Guo, J., and Wang, T.: Effects of rodent-induced land  
405 degradation on ecosystem carbon fluxes in an alpine meadow in the Qinghai-Tibet Plateau,  
406 China, *Solid Earth*, 6, 303, doi:10.5194/se-6-303-2015, 2015.

407 Postel, S. and Starke, L.: Saving water for agriculture, *State of the World.*, 1990. 39-58, 1990.

408 Pulido Moncada, M., Gabriels, D., Cornelis, W., and Lobo, D.: Comparing aggregate stability  
409 tests for soil physical quality indicators, *Land Degradation & Development*, 26, 843-852, doi:  
410 10.1002/ldr.2225, 2015.

411 Reeve, R.: Modulus of rupture, *Methods of Soil Analysis. Part 1. Physical and Mineralogical*  
412 *Properties, Including Statistics of Measurement and Sampling*, 1965. 466-471, 1965.

413 Rhoades, J., Sparks, D., Page, A., Helmke, P., Loeppert, R., Soltanpour, P., Tabatabai, M.,  
414 Johnston, C., and Sumner, M.: Salinity: Electrical conductivity and total dissolved solids,  
415 *Methods of soil analysis. Part 3-chemical methods.*, 1996. 417-435, 1996.

416 Rhoades, J. D., Kandiah, A., and Mashali, A. M.: The use of saline waters for crop  
417 production, *FAO Rome*, 1992.

418 Richards, L.: Modulus of rupture as an index of crusting of soil, *Soil Science Society of*  
419 *America Journal*, 17, 321-323, 1953.

420 Roy, S. and Kashem, M. A.: Effects of Organic Manures in Changes of Some Soil Properties  
421 at Different Incubation Periods, *Open Journal of Soil Science*, doi:10.4236/ojss.2014.43011,  
422 2014.

423 Seker, C.: Effects of selected amendments on soil properties and emergence of wheat  
424 seedlings, *Canadian journal of soil science*, 83, 615-621, doi: 10.4141/S02-080, 2003.

425 Shiralipour, A., McConnell, D. B., and Smith, W. H.: Physical and chemical properties of  
426 soils as affected by municipal solid waste compost application, *Biomass and Bioenergy*, 3,  
427 261-266, doi:10.1016/0961-9534(92)90030-T, 1992.

428 Staff, S. S.: *Keys to soil taxonomy*, Department of Agriculture: Natural Resources  
429 Conservation Service, 2006.

430 Şeker, C. and Karakaplan, S.: Konya ovasında toprak özellikleri ile kırılma değerleri  
431 arasındaki ilişkiler, *Tr. J. of Agriculture and Forestry*, 29, 183-190, 1999.

432 Thomas, G.: Soil pH and soil acidity. In 'Methods of soil analysis. Part 3. Chemical  
433 methods'.(Ed. DL Sparks) pp. 475-490, *Soil Science Society of America: Madison, WI*,  
434 1996. 1996.

435 Uzun, İ.: Use of Spent Mushroom Compost in Sustainable Fruit Production, *Journal of Fruit*  
436 *and Ornamental Plant Research*, vol: 12, pp: 157-165, 2004.

437 Wu, Y., Xu, G., and Shao, H.: Furfural and its biochar improve the general properties of a  
438 saline soil, *Solid Earth*, 5, 665, doi:10.5194/se-5-665-2014, 2014.

439 Yazdanpanah, N., Mahmoodabadi, M., and Cerdà, A.: The impact of organic amendments on  
440 soil hydrology, structure and microbial respiration in semiarid lands, *Geoderma*, 266, 58-65,  
441 doi:10.1016/j.geoderma.2015.11.032, 2016.

442 Yilmaz, E.: Changes of some soil properties by agricultural processing waste (soybean pulp)  
443 amendment, *Journal of Food, Agriculture & Environment*, 8, 1057-1060, 2010.

444 Yu, Y. and Jia, Z.: Changes in soil organic carbon and nitrogen capacities of *Salix cheilophila*  
445 Schneid along a revegetation chronosequence in semi-arid degraded sandy land of the Gonghe  
446 Basin, Tibet Plateau, *Solid Earth*, 5, 1045, doi:10.5194/se-5-1045-2014, 2014.

447
